# Supplementary material
Source: PubMed Central journal article supplement (PMC3143603)

## SUPPLEMENTAL DATA

(Tables S1-S2, Figures S1-S3)

**Early transcriptional responses of HepG2-A16 liver cells to infection by *Plasmodium falciparum* sporozoites**

**Rana Chattopadhyay<sup>1\*</sup>, Patricia de la Vega<sup>1\*\*</sup>, Sun H. Paik<sup>2</sup>, Yoko Murata<sup>2</sup>, Earl W. Ferguson<sup>2</sup>,  
Thomas L. Richie<sup>1\*\*\*</sup> and Guck T. Ooi<sup>2</sup>**

From Malaria Program, Naval Medical Research Center, Silver Spring, MD 20910-7500<sup>1</sup>; Sun BioMedical Technologies Inc, Ridgecrest, CA 93555<sup>2</sup>; \* Present Address: Division of Vaccines & Related Product Applications, OVR/CBER/FDA, Rockville, MD 20852; Present Affiliation: US Military Malaria Vaccine Program, \*\* Walter Reed Army Institute of Research; \*\*\* Naval Medical Research Center

Running title: Early hepatocyte responses following malarial sporozoite infection  
Address correspondence to: Guck. T. Ooi, PhD, 1539 N. China Lake Blvd, Suite A, Ridgecrest, CA 93555, USA, Tel: 760-549-3120, Email: guckooi@sunbmt.com; Rana Chattopadhyay, PhD, OVR/CBER/FDA (HFM-481), 1401 Rockville Pike, Rockville, MD 20852, Tel: 301-796-1812, Email: rana.chattopadhyay@fda.hhs.gov

## **Supplementary Table S1**

**Table S1: Genes which are differentially expressed between *Spor* vs *SalGld*.** A total of 742 genes were found to be significant at  $p < 0.001$  level using a univariate pairwise test; the genes are listed in ranked order by their parametric p-values. Datasets representing the three time points within each experimental group have been grouped together and were regarded as experimental replicates. Genes whose expression in *Spor* showed >5-fold change in either direction relative to *SalGld* values are indicated in bold.

|          | <b>Gene symbol</b> | <b>Description</b>                                                      | <b>Parametric p-value</b> | <b>Fold-change</b> |
|----------|--------------------|-------------------------------------------------------------------------|---------------------------|--------------------|
| <b>1</b> | <b>KIF20A</b>      | <b>kinesin family member 20A</b>                                        | <b>&lt; 1e-07</b>         | <b>6.25</b>        |
| 2        | HSPA1A             | heat shock 70kDa protein 1A                                             | < 1e-07                   | 0.33               |
| 3        | TK1                | thymidine kinase 1, soluble                                             | < 1e-07                   | 3.03               |
| 4        | CDC20              | cell division cycle 20 homolog (S. cerevisiae)                          | < 1e-07                   | 4.00               |
| <b>5</b> | <b>AZGP1</b>       | <b>alpha-2-glycoprotein 1, zinc-binding</b>                             | <b>&lt; 1e-07</b>         | <b>0.18</b>        |
| <b>6</b> | <b>S100P</b>       | <b>S100 calcium binding protein P</b>                                   | <b>&lt; 1e-07</b>         | <b>0.20</b>        |
| 7        | CSE1L              | CSE1 chromosome segregation 1-like (yeast)                              | < 1e-07                   | 2.70               |
| 8        | C6orf173           | chromosome 6 open reading frame 173                                     | < 1e-07                   | 3.70               |
| 9        | UBE2C              | ubiquitin-conjugating enzyme E2C                                        | < 1e-07                   | 2.63               |
| 10       | OTC                | ornithine carbamoyltransferase                                          | < 1e-07                   | 2.86               |
| 11       | AURKA              | aurora kinase A                                                         | 1e-07                     | 4.00               |
| 12       | LGALS2             | lectin, galactoside-binding, soluble, 2                                 | 1e-07                     | 3.13               |
| 13       | TMED4              | transmembrane emp24 protein transport domain containing 4               | 1e-07                     | 2.94               |
| 14       | KLHL5              | kelch-like 5 (Drosophila)                                               | 1e-07                     | 0.37               |
| 15       | RBP1               | retinol binding protein 1, cellular                                     | 1e-07                     | 2.38               |
| 16       | PTTG1              | pituitary tumor-transforming 1                                          | 1e-07                     | 3.33               |
| 17       | AIMP1              | aminoacyl tRNA synthetase complex-interacting multifunctional protein 1 | 1e-07                     | 2.38               |
| 18       | ACOT13             | acyl-CoA thioesterase 13                                                | 1e-07                     | 2.86               |
| 19       | HNRNPA2B1          | heterogeneous nuclear ribonucleoprotein A2/B1                           | 1e-07                     | 2.17               |
| 20       | LRRN4              | leucine rich repeat neuronal 4                                          | 1e-07                     | 3.33               |
| 21       | ADH4               | alcohol dehydrogenase 4 (class II), pi polypeptide                      | 1e-07                     | 2.70               |
| 22       | GAS2L1             | growth arrest-specific 2 like 1                                         | 1e-07                     | 2.38               |
| 23       | CD36               | CD36 molecule (thrombospondin receptor)                                 | 1e-07                     | 2.70               |
| 24       | CENPF              | centromere protein F, 350/400ka (mitosin)                               | 2e-07                     | 4.17               |
| 25       | MYCBP              | c-myc binding protein                                                   | 2e-07                     | 2.27               |
| 26       | IL1RN              | interleukin 1 receptor antagonist                                       | 2e-07                     | 0.33               |
| 27       | MKI67              | antigen identified by monoclonal antibody Ki-67                         | 2e-07                     | 4.76               |
| 28       | DKK1               | dickkopf homolog 1 (Xenopus laevis)                                     | 2e-07                     | 5.00               |
| 29       | NASP               | nuclear autoantigenic sperm protein (histone-binding)                   | 2e-07                     | 2.27               |
| 30       | POLA1              | polymerase (DNA directed), alpha 1, catalytic subunit                   | 2e-07                     | 2.63               |
| 31       | TRIP13             | thyroid hormone receptor interactor 13                                  | 2e-07                     | 2.38               |
| 32       | ADH6               | alcohol dehydrogenase 6 (class V)                                       | 2e-07                     | 2.17               |
| 33       | IDS                | iduronate 2-sulfatase                                                   | 2e-07                     | 0.41               |

|           |              |                                                                                           |              |             |
|-----------|--------------|-------------------------------------------------------------------------------------------|--------------|-------------|
| 34        | SPC24        | SPC24, NDC80 kinetochore complex component, homolog ( <i>S. cerevisiae</i> )              | 3e-07        | 2.78        |
| 35        | EPN3         | epsin 3                                                                                   | 3e-07        | 2.13        |
| 36        | G6PD         | glucose-6-phosphate dehydrogenase                                                         | 3e-07        | 3.45        |
| 37        | DHDPSL       | dihydrodipicolinate synthase-like, mitochondrial                                          | 3e-07        | 3.03        |
| 38        | RABGAP1L     | RAB GTPase activating protein 1-like                                                      | 3e-07        | 2.78        |
| 39        | WHSC1        | Wolf-Hirschhorn syndrome candidate 1                                                      | 3e-07        | 2.27        |
| 40        | IDI2         | isopentenyl-diphosphate delta isomerase 2                                                 | 3e-07        | 0.47        |
| 41        | ANP32E       | acidic (leucine-rich) nuclear phosphoprotein 32 family, member E                          | 4e-07        | 2.44        |
| 42        | C12orf48     | chromosome 12 open reading frame 48                                                       | 4e-07        | 2.33        |
| 43        | PTTG3P       | pituitary tumor-transforming 3 (pseudogene)                                               | 4e-07        | 3.13        |
| 44        | SMC4         | structural maintenance of chromosomes 4                                                   | 4e-07        | 3.45        |
| 45        | WDR20        | WD repeat domain 20                                                                       | 4e-07        | 2.78        |
| 46        | C15orf23     | chromosome 15 open reading frame 23                                                       | 4e-07        | 2.22        |
| 47        | HIST1H2BK    | histone cluster 1, H2bk                                                                   | 4e-07        | 0.41        |
| 48        | RHOB         | ras homolog gene family, member B                                                         | 4e-07        | 0.38        |
| 49        | FOXRED2      | FAD-dependent oxidoreductase domain containing 2                                          | 4e-07        | 2.17        |
| 50        | KIF15        | kinesin family member 15                                                                  | 4e-07        | 3.23        |
| 51        | SLC30A7      | solute carrier family 30 (zinc transporter), member 7                                     | 4e-07        | 0.47        |
| 52        | AMBP         | alpha-1-microglobulin/bikunin precursor                                                   | 4e-07        | 0.47        |
| 53        | NCAPH        | non-SMC condensin I complex, subunit H                                                    | 5e-07        | 2.94        |
| 54        | CENPE        | centromere protein E, 312kDa                                                              | 5e-07        | 2.78        |
| 55        | CSDE1        | cold shock domain containing E1, RNA-binding                                              | 5e-07        | 0.44        |
| 56        | DNAJC12      | DnaJ (Hsp40) homolog, subfamily C, member 12                                              | 5e-07        | 0.33        |
| 57        | FAM3C        | family with sequence similarity 3, member C                                               | 5e-07        | 0.40        |
| 58        | GTSE1        | G-2 and S-phase expressed 1                                                               | 5e-07        | 3.70        |
| 59        | SLC38A6      | solute carrier family 38, member 6                                                        | 6e-07        | 2.33        |
| 60        | C7orf58      | chromosome 7 open reading frame 58                                                        | 6e-07        | 2.70        |
| 61        | HIST2H2BE    | histone cluster 2, H2be                                                                   | 6e-07        | 0.32        |
| 62        | HMOX1        | heme oxygenase (decycling) 1                                                              | 6e-07        | 2.63        |
| 63        | C19orf69     | chromosome 19 open reading frame 69                                                       | 6e-07        | 3.03        |
| 64        | IQGAP3       | IQ motif containing GTPase activating protein 3                                           | 7e-07        | 3.03        |
| 65        | KPNB1        | karyopherin (importin) beta 1                                                             | 7e-07        | 1.92        |
| 66        | CCNB1        | cyclin B1                                                                                 | 7e-07        | 3.45        |
| 67        | RPN2         | ribophorin II                                                                             | 7e-07        | 0.49        |
| 68        | CDC25C       | cell division cycle 25 homolog C ( <i>S. pombe</i> )                                      | 7e-07        | 2.50        |
| <b>69</b> | <b>ITIH3</b> | <b>inter-alpha (globulin) inhibitor H3</b>                                                | <b>8e-07</b> | <b>0.18</b> |
| 70        | TNFRSF10D    | tumor necrosis factor receptor superfamily, member 10d, decoy with truncated death domain | 8e-07        | 0.32        |
| 71        | ELP4         | elongation protein 4 homolog ( <i>S. cerevisiae</i> )                                     | 8e-07        | 2.38        |
| 72        | LMNB1        | lamin B1                                                                                  | 9e-07        | 2.50        |
| 73        | KRT19        | keratin 19                                                                                | 9e-07        | 4.76        |
| 74        | ZWILCH       | Zwilch, kinetochore associated, homolog ( <i>Drosophila</i> )                             | 9e-07        | 2.33        |
| 75        | ZC3H4        | zinc finger CCCH-type containing 4                                                        | 9e-07        | 2.33        |
| 76        | BUB1         | budding uninhibited by benzimidazoles 1 homolog (yeast)                                   | 1e-06        | 3.85        |

|           |              |                                                                                                                                         |                |             |
|-----------|--------------|-----------------------------------------------------------------------------------------------------------------------------------------|----------------|-------------|
| 77        | CD302        | CD302 molecule                                                                                                                          | 1e-06          | 0.39        |
| 78        | MCCC2        | methylcrotonoyl-Coenzyme A carboxylase 2 (beta)                                                                                         | 1e-06          | 1.92        |
| 79        | FGL1         | fibrinogen-like 1                                                                                                                       | 1e-06          | 0.37        |
| 80        | SEMA3G       | sema domain, immunoglobulin domain (Ig), short basic domain, secreted, (semaphorin) 3G                                                  | 1.1e-06        | 0.38        |
| 81        | DNMT1        | DNA (cytosine-5-)-methyltransferase 1                                                                                                   | 1.1e-06        | 2.04        |
| 82        | ATP5G1       | ATP synthase, H+ transporting, mitochondrial F0 complex, subunit C1 (subunit 9)                                                         | 1.1e-06        | 2.00        |
| 83        | DDX39        | DEAD (Asp-Glu-Ala-Asp) box polypeptide 39                                                                                               | 1.1e-06        | 1.96        |
| 84        | PPAPDC1B     | phosphatidic acid phosphatase type 2 domain containing 1B                                                                               | 1.2e-06        | 0.50        |
| <b>85</b> | <b>CCL20</b> | <b>chemokine (C-C motif) ligand 20</b>                                                                                                  | <b>1.2e-06</b> | <b>0.13</b> |
| 86        | CDC2         | cell division cycle 2, G1 to S and G2 to M                                                                                              | 1.2e-06        | 4.17        |
| 87        | KLF10        | Kruppel-like factor 10                                                                                                                  | 1.3e-06        | 0.21        |
| 88        | LRRC40       | leucine rich repeat containing 40                                                                                                       | 1.3e-06        | 2.04        |
| 89        | G6PC         | glucose-6-phosphatase, catalytic subunit                                                                                                | 1.3e-06        | 0.25        |
| 90        | ANKRD57      | ankyrin repeat domain 57                                                                                                                | 1.3e-06        | 0.44        |
| 91        | ISG20        | interferon stimulated exonuclease gene 20kDa                                                                                            | 1.3e-06        | 0.49        |
| 92        | CDCA3        | cell division cycle associated 3                                                                                                        | 1.3e-06        | 3.85        |
| 93        | TP53INP2     | tumor protein p53 inducible nuclear protein 2                                                                                           | 1.3e-06        | 0.45        |
| 94        | FXYD1        | FXYD domain containing ion transport regulator 1                                                                                        | 1.3e-06        | 0.49        |
| 95        | TGFB1        | transforming growth factor, beta 1                                                                                                      | 1.3e-06        | 0.38        |
| 96        | SEC23IP      | SEC23 interacting protein                                                                                                               | 1.3e-06        | 0.46        |
| 97        | FIGNL1       | fidgetin-like 1                                                                                                                         | 1.4e-06        | 2.63        |
| 98        | SRPRB        | signal recognition particle receptor, B subunit                                                                                         | 1.4e-06        | 0.40        |
| 99        | RBMS1        | RNA binding motif, single stranded interacting protein 1                                                                                | 1.4e-06        | 0.48        |
| 100       | SEC24D       | SEC24 family, member D ( <i>S. cerevisiae</i> )                                                                                         | 1.4e-06        | 0.51        |
| 101       | CRLS1        | cardiolipin synthase 1                                                                                                                  | 1.4e-06        | 2.00        |
| 102       | SSR1         | signal sequence receptor, alpha                                                                                                         | 1.4e-06        | 0.56        |
| 103       | RBP2         | retinol binding protein 2, cellular                                                                                                     | 1.5e-06        | 2.44        |
| 104       | HLA-C        | major histocompatibility complex, class I, C                                                                                            | 1.5e-06        | 0.45        |
| 105       | H2AFX        | H2A histone family, member X                                                                                                            | 1.5e-06        | 2.70        |
| 106       | SKP2         | S-phase kinase-associated protein 2 (p45)                                                                                               | 1.5e-06        | 2.13        |
| 107       | CLU          | clusterin                                                                                                                               | 1.6e-06        | 0.30        |
| 108       | TMEM107      | transmembrane protein 107                                                                                                               | 1.6e-06        | 1.96        |
| 109       | HSPA5        | heat shock 70kDa protein 5 (glucose-regulated protein, 78kDa)                                                                           | 1.6e-06        | 0.48        |
| 110       | CALML4       | calmodulin-like 4                                                                                                                       | 1.6e-06        | 3.03        |
| 111       | VTN          | vitronectin                                                                                                                             | 1.6e-06        | 0.39        |
| 112       | SLC2A2       | solute carrier family 2 (facilitated glucose transporter), member 2                                                                     | 1.7e-06        | 1.96        |
| 113       | TM4SF5       | transmembrane 4 L six family member 5                                                                                                   | 1.7e-06        | 0.36        |
| 114       | MTHFD1       | methylenetetrahydrofolate dehydrogenase (NADP+ dependent) 1, methenyltetrahydrofolate cyclohydrolase, formyltetrahydrofolate synthetase | 1.7e-06        | 2.13        |
| 115       | CPE          | carboxypeptidase E                                                                                                                      | 1.7e-06        | 0.45        |
| 116       | C5           | complement component 5                                                                                                                  | 1.7e-06        | 0.22        |
| 117       | RNF138       | ring finger protein 138                                                                                                                 | 1.8e-06        | 2.63        |
| 118       | ATPIF1       | ATPase inhibitory factor 1                                                                                                              | 1.8e-06        | 1.75        |

|            |                 |                                                                                                      |                |             |
|------------|-----------------|------------------------------------------------------------------------------------------------------|----------------|-------------|
| 119        | C12orf44        | chromosome 12 open reading frame 44                                                                  | 1.8e-06        | 0.55        |
| 120        | CSTF3           | cleavage stimulation factor, 3' pre-RNA, subunit 3, 77kDa                                            | 1.9e-06        | 1.92        |
| 121        | PSPC1           | paraspeckle component 1                                                                              | 2e-06          | 2.38        |
| 122        | HIST1H1C        | histone cluster 1, H1c                                                                               | 2e-06          | 0.21        |
| 123        | FST             | follistatin                                                                                          | 2e-06          | 0.31        |
| 124        | SGK493          | protein kinase-like protein Sgk493                                                                   | 2e-06          | 2.13        |
| <b>125</b> | <b>NCAPG</b>    | <b>non-SMC condensin I complex, subunit G</b>                                                        | <b>2e-06</b>   | <b>6.67</b> |
| 126        | CLIP2           | CAP-GLY domain containing linker protein 2                                                           | 2e-06          | 0.43        |
| 127        | MCM5            | minichromosome maintenance complex component 5                                                       | 2.1e-06        | 3.85        |
| <b>128</b> | <b>SERPINE1</b> | <b>serpin peptidase inhibitor, clade E (nexin, plasminogen activator inhibitor type 1), member 1</b> | <b>2.1e-06</b> | <b>0.18</b> |
| 129        | CRYBG3          | beta-gamma crystallin domain containing 3                                                            | 2.1e-06        | 1.82        |
| 130        | CCNE2           | cyclin E2                                                                                            | 2.1e-06        | 2.13        |
| 131        | IER3            | immediate early response 3                                                                           | 2.1e-06        | 0.44        |
| 132        | NDUFB1          | NADH dehydrogenase (ubiquinone) 1 beta subcomplex, 1, 7kDa                                           | 2.2e-06        | 2.00        |
| 133        | AHSG            | alpha-2-HS-glycoprotein                                                                              | 2.2e-06        | 0.28        |
| 134        | DAB2            | disabled homolog 2, mitogen-responsive phosphoprotein (Drosophila)                                   | 2.2e-06        | 2.56        |
| 135        | VDAC3           | voltage-dependent anion channel 3                                                                    | 2.2e-06        | 1.75        |
| 136        | C2orf68         | chromosome 2 open reading frame 68                                                                   | 2.2e-06        | 0.47        |
| 137        | TOP2A           | topoisomerase (DNA) II alpha 170kDa                                                                  | 2.3e-06        | 3.45        |
| 138        | F5              | coagulation factor V (proaccelerin, labile factor)                                                   | 2.3e-06        | 0.37        |
| 139        | LYPLA1          | lysophospholipase I                                                                                  | 2.3e-06        | 0.57        |
| 140        | SDC4            | syndecan 4                                                                                           | 2.3e-06        | 0.47        |
| 141        | RPP30           | ribonuclease P/MRP 30kDa subunit                                                                     | 2.3e-06        | 2.44        |
| 142        | TMEM59          | transmembrane protein 59                                                                             | 2.4e-06        | 0.42        |
| 143        | PNRC2           | proline-rich nuclear receptor coactivator 2                                                          | 2.4e-06        | 1.69        |
| 144        | C12orf57        | chromosome 12 open reading frame 57                                                                  | 2.4e-06        | 0.41        |
| 145        | CD109           | CD109 molecule                                                                                       | 2.4e-06        | 0.39        |
| 146        | LOXL4           | lysyl oxidase-like 4                                                                                 | 2.5e-06        | 0.38        |
| 147        | SEC11C          | SEC11 homolog C (S. cerevisiae)                                                                      | 2.5e-06        | 0.39        |
| 148        | DTL             | denticleless homolog (Drosophila)                                                                    | 2.5e-06        | 2.94        |
| 149        | KIF22           | kinesin family member 22                                                                             | 2.6e-06        | 2.13        |
| 150        | ULK4            | unc-51-like kinase 4 (C. elegans)                                                                    | 2.7e-06        | 2.13        |
| 151        | ARV1            | ARV1 homolog (S. cerevisiae)                                                                         | 2.7e-06        | 1.96        |
| 152        | NUSAP1          | nucleolar and spindle associated protein 1                                                           | 2.7e-06        | 3.57        |
| <b>153</b> | <b>TTR</b>      | <b>transthyretin</b>                                                                                 | <b>2.7e-06</b> | <b>0.20</b> |
| 154        | SARS            | seryl-tRNA synthetase                                                                                | 2.8e-06        | 0.45        |
| 155        | ORC3L           | origin recognition complex, subunit 3-like (yeast)                                                   | 2.8e-06        | 1.96        |
| 156        | NEK2            | NIMA (never in mitosis gene a)-related kinase 2                                                      | 2.8e-06        | 3.23        |
| 157        | UHRF1           | ubiquitin-like with PHD and ring finger domains 1                                                    | 2.9e-06        | 2.78        |
| 158        | ZMAT3           | zinc finger, matrin type 3                                                                           | 2.9e-06        | 0.40        |
| 159        | NIPBL           | Nipped-B homolog (Drosophila)                                                                        | 2.9e-06        | 1.79        |
| 160        | CTSB            | cathepsin B                                                                                          | 3e-06          | 0.47        |

|            |              |                                                                                                        |                |             |
|------------|--------------|--------------------------------------------------------------------------------------------------------|----------------|-------------|
| 161        | C20orf108    | chromosome 20 open reading frame 108                                                                   | 3e-06          | 0.44        |
| 162        | FN1          | fibronectin 1                                                                                          | 3e-06          | 0.56        |
| 163        | PPIH         | peptidylprolyl isomerase H (cyclophilin H)                                                             | 3.1e-06        | 2.22        |
| 164        | SHMT1        | serine hydroxymethyltransferase 1 (soluble)                                                            | 3.1e-06        | 1.75        |
| 165        | ABCC6        | ATP-binding cassette, sub-family C (CFTR/MRP), member 6                                                | 3.1e-06        | 1.72        |
| 166        | NUP107       | nucleoporin 107kDa                                                                                     | 3.1e-06        | 2.00        |
| 167        | ZNF207       | zinc finger protein 207                                                                                | 3.2e-06        | 0.36        |
| 168        | WSB2         | WD repeat and SOCS box-containing 2                                                                    | 3.2e-06        | 0.56        |
| 169        | MANF         | mesencephalic astrocyte-derived neurotrophic factor                                                    | 3.2e-06        | 0.57        |
| 170        | KITLG        | KIT ligand                                                                                             | 3.2e-06        | 2.63        |
| 171        | CMBL         | carboxymethylenebutenolidase homolog (Pseudomonas)                                                     | 3.3e-06        | 1.85        |
| 172        | CPD          | carboxypeptidase D                                                                                     | 3.4e-06        | 0.58        |
| 173        | JAG1         | jagged 1 (Alagille syndrome)                                                                           | 3.4e-06        | 0.53        |
| 174        | SERPINF1     | serpin peptidase inhibitor, clade F (alpha-2 antiplasmin, pigment epithelium derived factor), member 1 | 3.4e-06        | 0.51        |
| 175        | PTTG1IP      | pituitary tumor-transforming 1 interacting protein                                                     | 3.5e-06        | 0.52        |
| 176        | DNLZ         | DNL-type zinc finger                                                                                   | 3.5e-06        | 0.52        |
| 177        | C2           | complement component 2                                                                                 | 3.5e-06        | 0.40        |
| 178        | TMEM33       | transmembrane protein 33                                                                               | 3.5e-06        | 0.54        |
| 179        | TACC3        | transforming, acidic coiled-coil containing protein 3                                                  | 3.7e-06        | 3.23        |
| 180        | LOC285943    | hypothetical protein LOC285943                                                                         | 3.7e-06        | 2.13        |
| 181        | PEX3         | peroxisomal biogenesis factor 3                                                                        | 3.7e-06        | 1.79        |
| 182        | BOK          | BCL2-related ovarian killer                                                                            | 3.8e-06        | 0.44        |
| 183        | C20orf19     | chromosome 20 open reading frame 19                                                                    | 3.8e-06        | 1.75        |
| <b>184</b> | <b>CP</b>    | <b>ceruloplasmin (ferroxidase)</b>                                                                     | <b>3.9e-06</b> | <b>0.12</b> |
| 185        | HLA-B        | major histocompatibility complex, class I, B                                                           | 3.9e-06        | 0.40        |
| 186        | BCCIP        | BRCA2 and CDKN1A interacting protein                                                                   | 3.9e-06        | 2.04        |
| 187        | THRB         | thyroid hormone receptor, beta (erythroblastic leukemia viral (v-erb-a) oncogene homolog 2, avian)     | 3.9e-06        | 1.82        |
| <b>188</b> | <b>GDF15</b> | <b>growth differentiation factor 15</b>                                                                | <b>4e-06</b>   | <b>0.18</b> |
| 189        | AURKB        | aurora kinase B                                                                                        | 4.1e-06        | 3.23        |
| 190        | ALKBH7       | alkB, alkylation repair homolog 7 (E. coli)                                                            | 4.1e-06        | 0.60        |
| 191        | BPIL1        | bactericidal/permeability-increasing protein-like 1                                                    | 4.1e-06        | 0.25        |
| 192        | DLGAP5       | discs, large (Drosophila) homolog-associated protein 5                                                 | 4.1e-06        | 3.45        |
| 193        | RNF115       | ring finger protein 115                                                                                | 4.2e-06        | 1.72        |
| 194        | PDS5A        | PDS5, regulator of cohesion maintenance, homolog A (S. cerevisiae)                                     | 4.3e-06        | 1.75        |
| 195        | HSPB11       | heat shock protein family B (small), member 11                                                         | 4.5e-06        | 2.27        |
| 196        | C12orf75     | chromosome 12 open reading frame 75                                                                    | 4.5e-06        | 1.79        |
| 197        | NUDT15       | nudix (nucleoside diphosphate linked moiety X)-type motif 15                                           | 4.5e-06        | 1.69        |
| 198        | MLF1IP       | MLF1 interacting protein                                                                               | 4.7e-06        | 3.33        |
| 199        | GINS3        | GINS complex subunit 3 (Psf3 homolog)                                                                  | 4.7e-06        | 2.56        |
| 200        | RAB22A       | RAB22A, member RAS oncogene family                                                                     | 4.7e-06        | 0.49        |
| 201        | RPA1         | replication protein A1, 70kDa                                                                          | 4.8e-06        | 2.08        |
| 202        | SMPDL3A      | sphingomyelin phosphodiesterase, acid-like 3A                                                          | 4.8e-06        | 0.54        |

|            |              |                                                                                  |                |             |
|------------|--------------|----------------------------------------------------------------------------------|----------------|-------------|
| 203        | AKR1D1       | aldo-keto reductase family 1, member D1 (delta 4-3-ketosteroid-5-beta-reductase) | 4.9e-06        | 2.94        |
| 204        | FOXN3        | forkhead box N3                                                                  | 4.9e-06        | 0.43        |
| 205        | FAM171A1     | family with sequence similarity 171, member A1                                   | 5e-06          | 0.52        |
| 206        | OPTN         | optineurin                                                                       | 5.1e-06        | 0.46        |
| 207        | LIG1         | ligase I, DNA, ATP-dependent                                                     | 5.1e-06        | 1.85        |
| 208        | VAMP5        | vesicle-associated membrane protein 5 (myobrevin)                                | 5.2e-06        | 0.48        |
| 209        | TRIM50       | tripartite motif-containing 50                                                   | 5.2e-06        | 2.27        |
| 210        | CENPN        | centromere protein N                                                             | 5.3e-06        | 2.94        |
| 211        | CDT1         | chromatin licensing and DNA replication factor 1                                 | 5.4e-06        | 2.94        |
| 212        | CCPG1        | cell cycle progression 1                                                         | 5.5e-06        | 0.54        |
| 213        | RB1          | retinoblastoma 1                                                                 | 5.5e-06        | 1.96        |
| 214        | ZNRF1        | zinc and ring finger 1                                                           | 5.6e-06        | 0.47        |
| 215        | CDCA2        | cell division cycle associated 2                                                 | 5.6e-06        | 2.86        |
| 216        | SYTL2        | synaptotagmin-like 2                                                             | 5.6e-06        | 2.86        |
| 217        | GTPBP4       | GTP binding protein 4                                                            | 5.7e-06        | 0.49        |
| 218        | C19orf10     | chromosome 19 open reading frame 10                                              | 5.7e-06        | 0.46        |
| 219        | C21orf45     | chromosome 21 open reading frame 45                                              | 5.9e-06        | 2.86        |
| 220        | SLC35E1      | solute carrier family 35, member E1                                              | 5.9e-06        | 0.58        |
| 221        | CCNI         | cyclin I                                                                         | 6e-06          | 0.50        |
| 222        | APOBEC3B     | apolipoprotein B mRNA editing enzyme, catalytic polypeptide-like 3B              | 6e-06          | 4.76        |
| 223        | C18orf10     | chromosome 18 open reading frame 10                                              | 6e-06          | 2.08        |
| 224        | KIF2C        | kinesin family member 2C                                                         | 6e-06          | 2.63        |
| 225        | SSX2IP       | synovial sarcoma, X breakpoint 2 interacting protein                             | 6.1e-06        | 2.04        |
| 226        | DNAJC3       | DnaJ (Hsp40) homolog, subfamily C, member 3                                      | 6.1e-06        | 0.58        |
| 227        | RPL10L       | ribosomal protein L10-like                                                       | 6.1e-06        | 0.58        |
| 228        | TGFBI        | transforming growth factor, beta-induced, 68kDa                                  | 6.2e-06        | 0.57        |
| 229        | ETFB         | electron-transfer-flavoprotein, beta polypeptide                                 | 6.2e-06        | 0.48        |
| 230        | HJURP        | Holliday junction recognition protein                                            | 6.3e-06        | 2.33        |
| 231        | EPPK1        | epiplakin 1                                                                      | 6.4e-06        | 0.53        |
| 232        | ZBTB2        | zinc finger and BTB domain containing 2                                          | 6.6e-06        | 2.38        |
| 233        | RBM15        | RNA binding motif protein 15                                                     | 6.6e-06        | 2.33        |
| 234        | FAM148A      | family with sequence similarity 148, member A                                    | 6.7e-06        | 2.38        |
| 235        | MTAP         | methylthioadenosine phosphorylase                                                | 6.8e-06        | 1.92        |
| 236        | PPP2CB       | protein phosphatase 2 (formerly 2A), catalytic subunit, beta isoform             | 6.8e-06        | 0.56        |
| 237        | L1CAM        | L1 cell adhesion molecule                                                        | 6.8e-06        | 0.52        |
| 238        | ZNF367       | zinc finger protein 367                                                          | 6.8e-06        | 2.08        |
| 239        | SEZ6L2       | seizure related 6 homolog (mouse)-like 2                                         | 6.9e-06        | 0.49        |
| 240        | TRIM24       | tripartite motif-containing 24                                                   | 6.9e-06        | 1.79        |
| 241        | RTN3         | reticulon 3                                                                      | 7e-06          | 0.62        |
| <b>242</b> | <b>CXCL2</b> | <b>chemokine (C-X-C motif) ligand 2</b>                                          | <b>7.1e-06</b> | <b>0.15</b> |
| 243        | JUNB         | jun B proto-oncogene                                                             | 7.1e-06        | 0.50        |
| 244        | SNRPF        | small nuclear ribonucleoprotein polypeptide F                                    | 7.2e-06        | 1.85        |
| 245        | PHF19        | PHD finger protein 19                                                            | 7.2e-06        | 1.75        |

|     |          |                                                                                          |          |      |
|-----|----------|------------------------------------------------------------------------------------------|----------|------|
| 246 | REEP4    | receptor accessory protein 4                                                             | 7.5e-06  | 1.69 |
| 247 | BHMT2    | betaine-homocysteine methyltransferase 2                                                 | 7.5e-06  | 1.72 |
| 248 | KIF4A    | kinesin family member 4A                                                                 | 7.5e-06  | 2.78 |
| 249 | DDX46    | DEAD (Asp-Glu-Ala-Asp) box polypeptide 46                                                | 7.6e-06  | 1.67 |
| 250 | SERPIND1 | serpin peptidase inhibitor, clade D (heparin cofactor), member 1                         | 7.6e-06  | 0.39 |
| 251 | F10      | coagulation factor X                                                                     | 7.7e-06  | 0.46 |
| 252 | SF3B3    | splicing factor 3b, subunit 3, 130kDa                                                    | 7.9e-06  | 1.59 |
| 253 | HNRNPD   | heterogeneous nuclear ribonucleoprotein D (AU-rich element RNA binding protein 1, 37kDa) | 8e-06    | 1.85 |
| 254 | FNDC3B   | fibronectin type III domain containing 3B                                                | 8.2e-06  | 0.42 |
| 255 | VKORC1   | vitamin K epoxide reductase complex, subunit 1                                           | 8.4e-06  | 0.53 |
| 256 | GNAZ     | guanine nucleotide binding protein (G protein), alpha z polypeptide                      | 8.4e-06  | 0.60 |
| 257 | DUSP1    | dual specificity phosphatase 1                                                           | 8.4e-06  | 0.27 |
| 258 | DBF4     | DBF4 homolog (S. cerevisiae)                                                             | 8.4e-06  | 2.22 |
| 259 | RFX5     | regulatory factor X, 5 (influences HLA class II expression)                              | 8.5e-06  | 1.82 |
| 260 | SLC39A10 | solute carrier family 39 (zinc transporter), member 10                                   | 8.5e-06  | 0.50 |
| 261 | TTK      | TTK protein kinase                                                                       | 8.6e-06  | 3.85 |
| 262 | PAM      | peptidylglycine alpha-amidating monooxygenase                                            | 8.6e-06  | 0.52 |
| 263 | MCAM     | melanoma cell adhesion molecule                                                          | 8.7e-06  | 1.92 |
| 264 | SGOL2    | shugoshin-like 2 (S. pombe)                                                              | 8.8e-06  | 3.03 |
| 265 | CKAP2L   | cytoskeleton associated protein 2-like                                                   | 8.8e-06  | 1.92 |
| 266 | GPAM     | glycerol-3-phosphate acyltransferase, mitochondrial                                      | 9e-06    | 0.49 |
| 267 | NEIL3    | nei endonuclease VIII-like 3 (E. coli)                                                   | 9.1e-06  | 2.22 |
| 268 | AGPAT9   | 1-acylglycerol-3-phosphate O-acyltransferase 9                                           | 9.3e-06  | 0.47 |
| 269 | DIAPH3   | diaphanous homolog 3 (Drosophila)                                                        | 9.4e-06  | 2.63 |
| 270 | MYBL2    | v-myb myeloblastosis viral oncogene homolog (avian)-like 2                               | 9.5e-06  | 1.85 |
| 271 | DGAT1    | diacylglycerol O-acyltransferase homolog 1 (mouse)                                       | 9.5e-06  | 1.96 |
| 272 | REEP6    | receptor accessory protein 6                                                             | 9.5e-06  | 2.17 |
| 273 | FAM64A   | family with sequence similarity 64, member A                                             | 9.6e-06  | 1.72 |
| 274 | ITGB3BP  | integrin beta 3 binding protein (beta3-endonexin)                                        | 9.7e-06  | 2.17 |
| 275 | HSPH1    | heat shock 105kDa/110kDa protein 1                                                       | 9.9e-06  | 0.40 |
| 276 | PNMA1    | paraneoplastic antigen MA1                                                               | 9.9e-06  | 0.56 |
| 277 | ASF1A    | ASF1 anti-silencing function 1 homolog A (S. cerevisiae)                                 | 1.01e-05 | 1.85 |
| 278 | ASPM     | asp (abnormal spindle) homolog, microcephaly associated (Drosophila)                     | 1.04e-05 | 3.45 |
| 279 | RBM24    | RNA binding motif protein 24                                                             | 1.05e-05 | 0.48 |
| 280 | TMCO3    | transmembrane and coiled-coil domains 3                                                  | 1.06e-05 | 0.48 |
| 281 | VRK1     | vaccinia related kinase 1                                                                | 1.07e-05 | 2.63 |
| 282 | KIAA0101 | KIAA0101                                                                                 | 1.08e-05 | 3.03 |
| 283 | OSR2     | odd-skipped related 2 (Drosophila)                                                       | 1.08e-05 | 1.61 |
| 284 | APPL2    | adaptor protein, phosphotyrosine interaction, PH domain and leucine zipper containing 2  | 1.09e-05 | 0.59 |
| 285 | IGFBP2   | insulin-like growth factor binding protein 2, 36kDa                                      | 1.09e-05 | 0.43 |
| 286 | NTAN1    | N-terminal asparagine amidase                                                            | 1.1e-05  | 0.52 |
| 287 | SSR3     | signal sequence receptor, gamma (translocon-associated protein gamma)                    | 1.11e-05 | 0.48 |
| 288 | C14orf28 | chromosome 14 open reading frame 28                                                      | 1.11e-05 | 0.36 |



|            |              |                                                                            |                 |             |
|------------|--------------|----------------------------------------------------------------------------|-----------------|-------------|
| 289        | NCOR1        | nuclear receptor co-repressor 1                                            | 1.13e-05        | 1.61        |
| 290        | APOC1        | apolipoprotein C-I                                                         | 1.13e-05        | 0.55        |
| 291        | PGC          | progastricsin (pepsinogen C)                                               | 1.14e-05        | 0.55        |
| 292        | ATRN         | attractin                                                                  | 1.14e-05        | 0.49        |
| 293        | C22orf32     | chromosome 22 open reading frame 32                                        | 1.16e-05        | 0.46        |
| 294        | APOE         | apolipoprotein E                                                           | 1.17e-05        | 0.56        |
| 295        | FLNA         | filamin A, alpha                                                           | 1.19e-05        | 0.50        |
| 296        | NHSL1        | NHS-like 1                                                                 | 1.19e-05        | 1.61        |
| 297        | POR          | P450 (cytochrome) oxidoreductase                                           | 1.2e-05         | 0.55        |
| 298        | IQCG         | IQ motif containing G                                                      | 1.21e-05        | 0.50        |
| 299        | RHBDD2       | rhomboid domain containing 2                                               | 1.22e-05        | 0.49        |
| 300        | PIGK         | phosphatidylinositol glycan anchor biosynthesis, class K                   | 1.22e-05        | 2.27        |
| <b>301</b> | <b>SPC25</b> | <b>SPC25, NDC80 kinetochore complex component, homolog (S. cerevisiae)</b> | <b>1.22e-05</b> | <b>7.14</b> |
| 302        | WDFY2        | WD repeat and FYVE domain containing 2                                     | 1.25e-05        | 0.56        |
| 303        | FAM54A       | family with sequence similarity 54, member A                               | 1.25e-05        | 4.55        |
| 304        | KIF18B       | kinesin family member 18B                                                  | 1.25e-05        | 3.85        |
| 305        | MATN3        | matrilin 3                                                                 | 1.27e-05        | 0.28        |
| 306        | HSPA13       | heat shock protein 70kDa family, member 13                                 | 1.3e-05         | 0.46        |
| 307        | ZBED3        | zinc finger, BED-type containing 3                                         | 1.3e-05         | 1.64        |
| 308        | VPS28        | vacuolar protein sorting 28 homolog (S. cerevisiae)                        | 1.31e-05        | 0.53        |
| 309        | ALDH7A1      | aldehyde dehydrogenase 7 family, member A1                                 | 1.31e-05        | 1.92        |
| 310        | SOD2         | superoxide dismutase 2, mitochondrial                                      | 1.31e-05        | 0.43        |
| 311        | CCDC53       | coiled-coil domain containing 53                                           | 1.35e-05        | 2.13        |
| 312        | SSR2         | signal sequence receptor, beta (translocon-associated protein beta)        | 1.36e-05        | 0.54        |
| 313        | CENPL        | centromere protein L                                                       | 1.36e-05        | 2.13        |
| 314        | F2           | coagulation factor II (thrombin)                                           | 1.36e-05        | 0.52        |
| 315        | PRC1         | protein regulator of cytokinesis 1                                         | 1.37e-05        | 2.63        |
| 316        | HMGXB4       | HMG box domain containing 4                                                | 1.4e-05         | 1.72        |
| 317        | CTHRC1       | collagen triple helix repeat containing 1                                  | 1.4e-05         | 0.39        |
| 318        | CUGBP1       | CUG triplet repeat, RNA binding protein 1                                  | 1.41e-05        | 1.54        |
| 319        | IGF2BP1      | insulin-like growth factor 2 mRNA binding protein 1                        | 1.42e-05        | 1.75        |
| 320        | PDIA3        | protein disulfide isomerase family A, member 3                             | 1.43e-05        | 0.45        |
| 321        | CDKN2C       | cyclin-dependent kinase inhibitor 2C (p18, inhibits CDK4)                  | 1.43e-05        | 3.45        |
| 322        | SPON2        | spondin 2, extracellular matrix protein                                    | 1.45e-05        | 0.49        |
| 323        | PDHA1        | pyruvate dehydrogenase (lipoamide) alpha 1                                 | 1.46e-05        | 1.82        |
| 324        | QSOX1        | quiescin Q6 sulfhydryl oxidase 1                                           | 1.46e-05        | 0.46        |
| 325        | PALLD        | palladin, cytoskeletal associated protein                                  | 1.47e-05        | 0.25        |
| 326        | C14orf143    | chromosome 14 open reading frame 143                                       | 1.48e-05        | 2.38        |
| 327        | DARS         | aspartyl-tRNA synthetase                                                   | 1.48e-05        | 1.75        |
| 328        | CBX5         | chromobox homolog 5 (HP1 alpha homolog, Drosophila)                        | 1.49e-05        | 2.70        |
| 329        | METAP2       | methionyl aminopeptidase 2                                                 | 1.49e-05        | 1.96        |
| 330        | DNAJC10      | DnaJ (Hsp40) homolog, subfamily C, member 10                               | 1.5e-05         | 0.44        |
| 331        | NETO2        | neuropilin (NRP) and tolloid (TLL)-like 2                                  | 1.51e-05        | 0.54        |

|     |             |                                                                                            |          |      |
|-----|-------------|--------------------------------------------------------------------------------------------|----------|------|
| 332 | ATF3        | activating transcription factor 3                                                          | 1.51e-05 | 0.23 |
| 333 | DDX20       | DEAD (Asp-Glu-Ala-Asp) box polypeptide 20                                                  | 1.53e-05 | 2.13 |
| 334 | SAMHD1      | SAM domain and HD domain 1                                                                 | 1.54e-05 | 2.04 |
| 335 | SLC7A11     | solute carrier family 7, (cationic amino acid transporter, y+ system) member 11            | 1.54e-05 | 2.78 |
| 336 | ERCC6L      | excision repair cross-complementing rodent repair deficiency, complementation group 6-like | 1.54e-05 | 1.82 |
| 337 | DEPDC1      | DEP domain containing 1                                                                    | 1.57e-05 | 1.89 |
| 338 | ARSD        | arylsulfatase D                                                                            | 1.58e-05 | 0.49 |
| 339 | NGRN        | neugrin, neurite outgrowth associated                                                      | 1.59e-05 | 0.51 |
| 340 | ATF4        | activating transcription factor 4 (tax-responsive enhancer element B67)                    | 1.6e-05  | 1.64 |
| 341 | CA9         | carbonic anhydrase IX                                                                      | 1.61e-05 | 0.24 |
| 342 | IL8         | interleukin 8                                                                              | 1.62e-05 | 0.36 |
| 343 | TIMM44      | translocase of inner mitochondrial membrane 44 homolog (yeast)                             | 1.65e-05 | 1.69 |
| 344 | CCDC34      | coiled-coil domain containing 34                                                           | 1.65e-05 | 2.44 |
| 345 | hCG_1811732 | hypothetical LOC151534                                                                     | 1.65e-05 | 2.08 |
| 346 | NR2F2       | nuclear receptor subfamily 2, group F, member 2                                            | 1.68e-05 | 2.22 |
| 347 | TMEM117     | transmembrane protein 117                                                                  | 1.7e-05  | 0.64 |
| 348 | SERP1       | stress-associated endoplasmic reticulum protein 1                                          | 1.72e-05 | 0.61 |
| 349 | TOMM20      | translocase of outer mitochondrial membrane 20 homolog (yeast)                             | 1.73e-05 | 0.41 |
| 350 | ODAM        | odontogenic, ameloblast associated                                                         | 1.74e-05 | 2.44 |
| 351 | TMEM64      | transmembrane protein 64                                                                   | 1.74e-05 | 0.42 |
| 352 | FUNDC2      | FUN14 domain containing 2                                                                  | 1.74e-05 | 0.33 |
| 353 | STXBP1      | syntaxin binding protein 1                                                                 | 1.75e-05 | 0.58 |
| 354 | DBF4B       | DBF4 homolog B ( <i>S. cerevisiae</i> )                                                    | 1.76e-05 | 1.96 |
| 355 | TF          | transferrin                                                                                | 1.79e-05 | 0.49 |
| 356 | STMN1       | stathmin 1                                                                                 | 1.8e-05  | 2.33 |
| 357 | MED25       | mediator complex subunit 25                                                                | 1.8e-05  | 2.27 |
| 358 | TXNIP       | thioredoxin interacting protein                                                            | 1.82e-05 | 0.36 |
| 359 | CCDC138     | coiled-coil domain containing 138                                                          | 1.84e-05 | 2.33 |
| 360 | STOM        | stomatin                                                                                   | 1.85e-05 | 0.60 |
| 361 | BUB1B       | budding uninhibited by benzimidazoles 1 homolog beta (yeast)                               | 1.9e-05  | 2.63 |
| 362 | TERF1       | telomeric repeat binding factor (NIMA-interacting) 1                                       | 1.93e-05 | 1.56 |
| 363 | IQCK        | IQ motif containing K                                                                      | 1.95e-05 | 2.08 |
| 364 | BAG1        | BCL2-associated athanogene                                                                 | 1.95e-05 | 0.58 |
| 365 | CXCL16      | chemokine (C-X-C motif) ligand 16                                                          | 1.96e-05 | 0.43 |
| 366 | PGCP        | plasma glutamate carboxypeptidase                                                          | 1.97e-05 | 0.48 |
| 367 | ARFGAP3     | ADP-ribosylation factor GTPase activating protein 3                                        | 1.98e-05 | 0.47 |
| 368 | SOX4        | SRY (sex determining region Y)-box 4                                                       | 1.98e-05 | 0.57 |
| 369 | C13orf34    | chromosome 13 open reading frame 34                                                        | 1.99e-05 | 2.17 |
| 370 | PDGFA       | platelet-derived growth factor alpha polypeptide                                           | 2.02e-05 | 0.35 |
| 371 | TROAP       | trophinin associated protein (tastin)                                                      | 2.05e-05 | 1.69 |
| 372 | CDKN3       | cyclin-dependent kinase inhibitor 3                                                        | 2.05e-05 | 2.27 |
| 373 | POLD1       | polymerase (DNA directed), delta 1, catalytic subunit 125kDa                               | 2.06e-05 | 1.85 |
| 374 | LARS2       | leucyl-tRNA synthetase 2, mitochondrial                                                    | 2.06e-05 | 1.72 |

|            |               |                                                                                               |                 |             |
|------------|---------------|-----------------------------------------------------------------------------------------------|-----------------|-------------|
| 375        | ANLN          | anillin, actin binding protein                                                                | 2.07e-05        | 3.23        |
| 376        | SNRNP48       | small nuclear ribonucleoprotein 48kDa (U11/U12)                                               | 2.1e-05         | 2.04        |
| 377        | BLM           | Bloom syndrome, RecQ helicase-like                                                            | 2.11e-05        | 2.08        |
| 378        | CPN2          | carboxypeptidase N, polypeptide 2                                                             | 2.12e-05        | 1.89        |
| 379        | SEC23B        | Sec23 homolog B ( <i>S. cerevisiae</i> )                                                      | 2.12e-05        | 0.45        |
| 380        | ASB9          | ankyrin repeat and SOCS box-containing 9                                                      | 2.13e-05        | 3.13        |
| 381        | SQSTM1        | sequestosome 1                                                                                | 2.15e-05        | 0.51        |
| 382        | CHAF1A        | chromatin assembly factor 1, subunit A (p150)                                                 | 2.16e-05        | 2.13        |
| 383        | GM2A          | GM2 ganglioside activator                                                                     | 2.17e-05        | 1.72        |
| 384        | PLEKHA1       | pleckstrin homology domain containing, family A (phosphoinositide binding specific) member 1  | 2.17e-05        | 0.54        |
| <b>385</b> | <b>CYP1A1</b> | <b>cytochrome P450, family 1, subfamily A, polypeptide 1</b>                                  | <b>2.17e-05</b> | <b>0.15</b> |
| 386        | RNASET2       | ribonuclease T2                                                                               | 2.17e-05        | 0.41        |
| 387        | SLC13A3       | solute carrier family 13 (sodium-dependent dicarboxylate transporter), member 3               | 2.18e-05        | 1.85        |
| 388        | TMPO          | thymopoietin                                                                                  | 2.24e-05        | 1.96        |
| 389        | HIST1H2AC     | histone cluster 1, H2ac                                                                       | 2.27e-05        | 0.31        |
| 390        | CNOT8         | CCR4-NOT transcription complex, subunit 8                                                     | 2.28e-05        | 0.44        |
| 391        | TPP1          | tripeptidyl peptidase I                                                                       | 2.29e-05        | 0.53        |
| 392        | C20orf199     | chromosome 20 open reading frame 199                                                          | 2.3e-05         | 0.58        |
| 393        | THBS1         | thrombospondin 1                                                                              | 2.3e-05         | 0.23        |
| 394        | PARN          | poly(A)-specific ribonuclease (deadenylation nuclease)                                        | 2.31e-05        | 1.67        |
| 395        | PIR           | pirin (iron-binding nuclear protein)                                                          | 2.31e-05        | 2.27        |
| 396        | PDZD8         | PDZ domain containing 8                                                                       | 2.32e-05        | 2.17        |
| 397        | SERPINE2      | serpin peptidase inhibitor, clade E (nexin, plasminogen activator inhibitor type 1), member 2 | 2.32e-05        | 0.36        |
| 398        | SKA3          | spindle and kinetochore associated complex subunit 3                                          | 2.33e-05        | 1.75        |
| 399        | KIF20B        | kinesin family member 20B                                                                     | 2.33e-05        | 2.27        |
| 400        | C12orf11      | chromosome 12 open reading frame 11                                                           | 2.34e-05        | 1.96        |
| 401        | ITPRIPL2      | inositol 1,4,5-triphosphate receptor interacting protein-like 2                               | 2.34e-05        | 0.52        |
| 402        | EXOC5         | exocyst complex component 5                                                                   | 2.36e-05        | 1.59        |
| 403        | MXRA7         | matrix-remodelling associated 7                                                               | 2.38e-05        | 0.52        |
| 404        | PCGF5         | polycomb group ring finger 5                                                                  | 2.44e-05        | 0.52        |
| 405        | PPARG         | peroxisome proliferator-activated receptor gamma                                              | 2.45e-05        | 0.58        |
| <b>406</b> | <b>NDC80</b>  | <b>NDC80 homolog, kinetochore complex component (<i>S. cerevisiae</i>)</b>                    | <b>2.45e-05</b> | <b>5.88</b> |
| 407        | PLK4          | polo-like kinase 4 ( <i>Drosophila</i> )                                                      | 2.49e-05        | 2.86        |
| 408        | LAMP2         | lysosomal-associated membrane protein 2                                                       | 2.51e-05        | 0.60        |
| 409        | CDCA4         | cell division cycle associated 4                                                              | 2.52e-05        | 1.92        |
| 410        | SERPINA5      | serpin peptidase inhibitor, clade A (alpha-1 antiproteinase, antitrypsin), member 5           | 2.53e-05        | 0.35        |
| 411        | CDC45L        | CDC45 cell division cycle 45-like ( <i>S. cerevisiae</i> )                                    | 2.55e-05        | 2.04        |
| 412        | ALCAM         | activated leukocyte cell adhesion molecule                                                    | 2.59e-05        | 0.52        |
| 413        | GAB1          | GRB2-associated binding protein 1                                                             | 2.63e-05        | 1.75        |
| 414        | SPAG5         | sperm associated antigen 5                                                                    | 2.63e-05        | 3.03        |
| 415        | HIST1H4C      | histone cluster 1, H4c                                                                        | 2.67e-05        | 2.50        |
| 416        | TUBA1A        | tubulin, alpha 1a                                                                             | 2.7e-05         | 0.34        |
| 417        | RIOK3         | RIO kinase 3 (yeast)                                                                          | 2.75e-05        | 0.36        |

|            |               |                                                                                                             |                 |             |
|------------|---------------|-------------------------------------------------------------------------------------------------------------|-----------------|-------------|
| 418        | UBASH3B       | ubiquitin associated and SH3 domain containing, B                                                           | 2.76e-05        | 0.66        |
| 419        | CENPM         | centromere protein M                                                                                        | 2.76e-05        | 2.04        |
| 420        | UBFD1         | ubiquitin family domain containing 1                                                                        | 2.76e-05        | 0.51        |
| 421        | HNRNPL        | heterogeneous nuclear ribonucleoprotein L                                                                   | 2.78e-05        | 1.72        |
| 422        | RNF14         | ring finger protein 14                                                                                      | 2.8e-05         | 0.41        |
| 423        | RPL3          | ribosomal protein L3                                                                                        | 2.81e-05        | 0.51        |
| 424        | SH3RF2        | SH3 domain containing ring finger 2                                                                         | 2.86e-05        | 2.27        |
| 425        | IFI30         | interferon, gamma-inducible protein 30                                                                      | 2.87e-05        | 1.72        |
| 426        | ETV4          | ets variant 4                                                                                               | 2.87e-05        | 0.41        |
| 427        | UPF3B         | UPF3 regulator of nonsense transcripts homolog B (yeast)                                                    | 2.89e-05        | 1.92        |
| 428        | PLG           | plasminogen                                                                                                 | 2.9e-05         | 0.52        |
| 429        | POLR1D        | polymerase (RNA) I polypeptide D, 16kDa                                                                     | 2.93e-05        | 0.49        |
| 430        | FANCM         | Fanconi anemia, complementation group M                                                                     | 2.96e-05        | 2.22        |
| 431        | MRE11A        | MRE11 meiotic recombination 11 homolog A ( <i>S. cerevisiae</i> )                                           | 2.98e-05        | 1.96        |
| 432        | MKLN1         | muskelin 1, intracellular mediator containing kelch motifs                                                  | 3.03e-05        | 0.60        |
| 433        | EPAS1         | endothelial PAS domain protein 1                                                                            | 3.05e-05        | 0.40        |
| 434        | TFF3          | trefoil factor 3 (intestinal)                                                                               | 3.07e-05        | 0.51        |
| 435        | SMPX          | small muscle protein, X-linked                                                                              | 3.07e-05        | 2.17        |
| 436        | OS9           | osteosarcoma amplified 9, endoplasmic reticulum lectin                                                      | 3.08e-05        | 0.47        |
| 437        | C5orf53       | chromosome 5 open reading frame 53                                                                          | 3.09e-05        | 0.62        |
| 438        | GEN1          | Gen homolog 1, endonuclease ( <i>Drosophila</i> )                                                           | 3.1e-05         | 2.00        |
| 439        | C9orf40       | chromosome 9 open reading frame 40                                                                          | 3.1e-05         | 2.17        |
| 440        | HMGN4         | high mobility group nucleosomal binding domain 4                                                            | 3.11e-05        | 0.47        |
| 441        | SMC2          | structural maintenance of chromosomes 2                                                                     | 3.14e-05        | 2.50        |
| 442        | AKAP12        | A kinase (PRKA) anchor protein 12                                                                           | 3.22e-05        | 0.48        |
| 443        | ST6GALNAC4    | ST6 (alpha-N-acetyl-neuraminy-2,3-beta-galactosyl-1,3)-N-acetylglactosaminide alpha-2,6-sialyltransferase 4 | 3.24e-05        | 0.56        |
| 444        | AKIRIN2       | akirin 2                                                                                                    | 3.26e-05        | 2.13        |
| 445        | CTSD          | cathepsin D                                                                                                 | 3.29e-05        | 0.37        |
| 446        | MAGOHB        | mago-nashi homolog B ( <i>Drosophila</i> )                                                                  | 3.3e-05         | 1.92        |
| 447        | C4orf46       | chromosome 4 open reading frame 46                                                                          | 3.3e-05         | 2.27        |
| 448        | BNIP2         | BCL2/adenovirus E1B 19kDa interacting protein 2                                                             | 3.31e-05        | 0.59        |
| 449        | SPTBN1        | spectrin, beta, non-erythrocytic 1                                                                          | 3.37e-05        | 0.45        |
| 450        | HRSP12        | heat-responsive protein 12                                                                                  | 3.37e-05        | 1.92        |
| 451        | IFRD1         | interferon-related developmental regulator 1                                                                | 3.41e-05        | 0.47        |
| 452        | RFXAP         | regulatory factor X-associated protein                                                                      | 3.41e-05        | 1.92        |
| 453        | ERLEC1        | endoplasmic reticulum lectin 1                                                                              | 3.41e-05        | 0.56        |
| <b>454</b> | <b>IGFBP1</b> | <b>insulin-like growth factor binding protein 1</b>                                                         | <b>3.46e-05</b> | <b>0.11</b> |
| 455        | SFRS2B        | splicing factor, arginine/serine-rich 2B                                                                    | 3.49e-05        | 0.64        |
| 456        | PLCB1         | phospholipase C, beta 1 (phosphoinositide-specific)                                                         | 3.54e-05        | 0.52        |
| 457        | CCNB2         | cyclin B2                                                                                                   | 3.62e-05        | 2.22        |
| 458        | SERPINA3      | serpin peptidase inhibitor, clade A (alpha-1 antiproteinase, antitrypsin), member 3                         | 3.68e-05        | 0.54        |
| 459        | CDCA8         | cell division cycle associated 8                                                                            | 3.76e-05        | 1.92        |

|            |             |                                                                           |                 |             |
|------------|-------------|---------------------------------------------------------------------------|-----------------|-------------|
| 460        | HELLS       | helicase, lymphoid-specific                                               | 3.82e-05        | 2.27        |
| 461        | PINK1       | PTEN induced putative kinase 1                                            | 3.83e-05        | 0.58        |
| 462        | KIF14       | kinesin family member 14                                                  | 3.85e-05        | 4.35        |
| 463        | ZDHHC4      | zinc finger, DHHC-type containing 4                                       | 3.94e-05        | 0.41        |
| 464        | DSCC1       | defective in sister chromatid cohesion 1 homolog ( <i>S. cerevisiae</i> ) | 4.03e-05        | 2.22        |
| 465        | MCM3        | minichromosome maintenance complex component 3                            | 4.09e-05        | 2.00        |
| 466        | CRYAA       | crystallin, alpha A                                                       | 4.13e-05        | 0.40        |
| 467        | MFSD6       | major facilitator superfamily domain containing 6                         | 4.28e-05        | 0.58        |
| 468        | BRCA1       | breast cancer 1, early onset                                              | 4.28e-05        | 3.70        |
| 469        | IL1R1       | interleukin 1 receptor, type I                                            | 4.29e-05        | 1.92        |
| 470        | HLA-F       | major histocompatibility complex, class I, F                              | 4.32e-05        | 0.53        |
| 471        | NCAPG2      | non-SMC condensin II complex, subunit G2                                  | 4.52e-05        | 2.94        |
| 472        | PHF10       | PHD finger protein 10                                                     | 4.58e-05        | 0.53        |
| 473        | HAUS1       | HAUS augmin-like complex, subunit 1                                       | 4.61e-05        | 1.92        |
| 474        | LMO4        | LIM domain only 4                                                         | 4.61e-05        | 1.64        |
| 475        | HMGB2       | high-mobility group box 2                                                 | 4.62e-05        | 2.50        |
| 476        | PTGR2       | prostaglandin reductase 2                                                 | 4.62e-05        | 1.96        |
| 477        | ZWINT       | ZW10 interactor                                                           | 4.65e-05        | 3.03        |
| 478        | ESPL1       | extra spindle pole bodies homolog 1 ( <i>S. cerevisiae</i> )              | 4.77e-05        | 2.38        |
| 479        | BHMT        | betaine-homocysteine methyltransferase                                    | 4.81e-05        | 2.00        |
| 480        | RFC3        | replication factor C (activator 1) 3, 38kDa                               | 4.83e-05        | 2.38        |
| 481        | ITGB2       | integrin, beta 2 (complement component 3 receptor 3 and 4 subunit)        | 4.84e-05        | 0.50        |
| 482        | ALDOA       | aldolase A, fructose-bisphosphate                                         | 4.88e-05        | 0.53        |
| 483        | HPS3        | Hermansky-Pudlak syndrome 3                                               | 4.88e-05        | 0.42        |
| 484        | C9orf3      | chromosome 9 open reading frame 3                                         | 4.94e-05        | 0.62        |
| 485        | HMMR        | hyaluronan-mediated motility receptor (RHAMM)                             | 4.95e-05        | 3.45        |
| 486        | TST         | thiosulfate sulfurtransferase (rhodanese)                                 | 4.98e-05        | 0.41        |
| 487        | PTPRF       | protein tyrosine phosphatase, receptor type, F                            | 5.02e-05        | 0.59        |
| <b>488</b> | <b>CTGF</b> | <b>connective tissue growth factor</b>                                    | <b>5.03e-05</b> | <b>0.16</b> |
| 489        | SERINC1     | serine incorporator 1                                                     | 5.04e-05        | 0.50        |
| 490        | STIL        | SCL/TAL1 interrupting locus                                               | 5.07e-05        | 2.04        |
| 491        | L3MBTL      | l(3)mbt-like ( <i>Drosophila</i> )                                        | 5.08e-05        | 0.47        |
| 492        | UPRT        | uracil phosphoribosyltransferase (FUR1) homolog ( <i>S. cerevisiae</i> )  | 5.09e-05        | 1.82        |
| 493        | GPSM2       | G-protein signaling modulator 2 (AGS3-like, <i>C. elegans</i> )           | 5.2e-05         | 2.22        |
| 494        | PRIM2       | primase, DNA, polypeptide 2 (58kDa)                                       | 5.2e-05         | 2.78        |
| 495        | UBE2Q2      | ubiquitin-conjugating enzyme E2Q family member 2                          | 5.24e-05        | 0.46        |
| 496        | SMC3        | structural maintenance of chromosomes 3                                   | 5.26e-05        | 2.04        |
| 497        | CCDC91      | coiled-coil domain containing 91                                          | 5.55e-05        | 0.51        |
| 498        | FANCI       | Fanconi anemia, complementation group I                                   | 5.56e-05        | 2.94        |
| 499        | KIF23       | kinesin family member 23                                                  | 5.57e-05        | 2.50        |
| 500        | HIST1H2BD   | histone cluster 1, H2bd                                                   | 5.62e-05        | 0.32        |
| 501        | SPTLC3      | serine palmitoyltransferase, long chain base subunit 3                    | 5.71e-05        | 2.56        |
| 502        | ORC5L       | origin recognition complex, subunit 5-like (yeast)                        | 5.8e-05         | 1.61        |

|            |               |                                                                                          |                 |             |
|------------|---------------|------------------------------------------------------------------------------------------|-----------------|-------------|
| 503        | IL18          | interleukin 18 (interferon-gamma-inducing factor)                                        | 5.82e-05        | 2.27        |
| 504        | LOC645722     | hypothetical LOC645722                                                                   | 5.84e-05        | 1.96        |
| 505        | MAP1LC3B      | microtubule-associated protein 1 light chain 3 beta                                      | 5.85e-05        | 0.56        |
| 506        | TIMP2         | TIMP metalloproteinase inhibitor 2                                                       | 5.88e-05        | 0.60        |
| 507        | FLJ12993      | hypothetical LOC441027                                                                   | 5.92e-05        | 1.92        |
| 508        | C14orf145     | chromosome 14 open reading frame 145                                                     | 5.94e-05        | 1.69        |
| 509        | CEP55         | centrosomal protein 55kDa                                                                | 6.03e-05        | 2.86        |
| 510        | KIF18A        | kinesin family member 18A                                                                | 6.12e-05        | 2.00        |
| 511        | SMURF2        | SMAD specific E3 ubiquitin protein ligase 2                                              | 6.16e-05        | 0.38        |
| 512        | TMX4          | thioredoxin-related transmembrane protein 4                                              | 6.17e-05        | 0.49        |
| 513        | CPN1          | carboxypeptidase N, polypeptide 1                                                        | 6.18e-05        | 0.52        |
| 514        | CENPH         | centromere protein H                                                                     | 6.37e-05        | 2.04        |
| 515        | TTYH1         | tweety homolog 1 (Drosophila)                                                            | 6.41e-05        | 0.57        |
| 516        | THOC2         | THO complex 2                                                                            | 6.48e-05        | 1.64        |
| 517        | TMPRSS3       | transmembrane protease, serine 3                                                         | 6.51e-05        | 0.32        |
| 518        | KLF11         | Kruppel-like factor 11                                                                   | 6.6e-05         | 0.38        |
| 519        | H2BFS         | H2B histone family, member S                                                             | 6.74e-05        | 0.28        |
| 520        | CPB2          | carboxypeptidase B2 (plasma)                                                             | 6.77e-05        | 1.82        |
| 521        | CSGALNACT2    | chondroitin sulfate N-acetylgalactosaminyltransferase 2                                  | 6.8e-05         | 0.50        |
| 522        | SUCLG2        | succinate-CoA ligase, GDP-forming, beta subunit                                          | 6.88e-05        | 0.61        |
| 523        | HIST1H2BC     | histone cluster 1, H2bc                                                                  | 6.9e-05         | 0.50        |
| 524        | NRTN          | neurturin                                                                                | 7.01e-05        | 0.42        |
| 525        | ASXL1         | additional sex combs like 1 (Drosophila)                                                 | 7.05e-05        | 1.79        |
| 526        | DIO1          | deiodinase, iodothyronine, type I                                                        | 7.07e-05        | 2.22        |
| 527        | CENPK         | centromere protein K                                                                     | 7.08e-05        | 2.63        |
| 528        | TRIM22        | tripartite motif-containing 22                                                           | 7.11e-05        | 0.56        |
| 529        | TPX2          | TPX2, microtubule-associated, homolog (Xenopus laevis)                                   | 7.19e-05        | 2.50        |
| 530        | CAMTA1        | calmodulin binding transcription activator 1                                             | 7.2e-05         | 0.50        |
| 531        | LRRFIP1       | leucine rich repeat (in FLII) interacting protein 1                                      | 7.24e-05        | 0.52        |
| 532        | HPCAL1        | hippocalcin-like 1                                                                       | 7.31e-05        | 0.52        |
| 533        | WWTR1         | WW domain containing transcription regulator 1                                           | 7.36e-05        | 0.51        |
| 534        | ERP27         | endoplasmic reticulum protein 27                                                         | 7.4e-05         | 2.70        |
| 535        | RNASE4        | ribonuclease, RNase A family, 4                                                          | 7.54e-05        | 0.38        |
| <b>536</b> | <b>TUBB2B</b> | <b>tubulin, beta 2B</b>                                                                  | <b>7.67e-05</b> | <b>0.18</b> |
| 537        | C20orf72      | chromosome 20 open reading frame 72                                                      | 7.69e-05        | 2.00        |
| 538        | MCM7          | minichromosome maintenance complex component 7                                           | 7.77e-05        | 1.79        |
| 539        | SHMT2         | serine hydroxymethyltransferase 2 (mitochondrial)                                        | 7.82e-05        | 0.44        |
| 540        | N4BP2L1       | NEDD4 binding protein 2-like 1                                                           | 7.82e-05        | 0.56        |
| 541        | APOM          | apolipoprotein M                                                                         | 8.02e-05        | 0.47        |
| 542        | CD9           | CD9 molecule                                                                             | 8.08e-05        | 0.44        |
| 543        | YWHAB         | tyrosine 3-monooxygenase/tryptophan 5-monooxygenase activation protein, beta polypeptide | 8.26e-05        | 0.43        |
| 544        | RBM3          | RNA binding motif (RNP1, RRM) protein 3                                                  | 8.29e-05        | 0.47        |
| 545        | NUF2          | NUF2, NDC80 kinetochore complex component, homolog (S. cerevisiae)                       | 8.4e-05         | 4.17        |

|     |           |                                                                                        |           |      |
|-----|-----------|----------------------------------------------------------------------------------------|-----------|------|
| 546 | TPM1      | tropomyosin 1 (alpha)                                                                  | 8.43e-05  | 0.49 |
| 547 | DIS3      | DIS3 mitotic control homolog ( <i>S. cerevisiae</i> )                                  | 8.53e-05  | 0.34 |
| 548 | C1orf135  | chromosome 1 open reading frame 135                                                    | 8.54e-05  | 1.67 |
| 549 | 40240     | membrane-associated ring finger (C3HC4) 3                                              | 8.57e-05  | 0.62 |
| 550 | MIXL1     | Mix1 homeobox-like 1 ( <i>Xenopus laevis</i> )                                         | 8.77e-05  | 0.53 |
| 551 | ALDH1A1   | aldehyde dehydrogenase 1 family, member A1                                             | 8.84e-05  | 2.27 |
| 552 | DCLRE1B   | DNA cross-link repair 1B (PSO2 homolog, <i>S. cerevisiae</i> )                         | 8.88e-05  | 2.08 |
| 553 | HIST1H2BE | histone cluster 1, H2be                                                                | 9.02e-05  | 0.40 |
| 554 | SRP72     | signal recognition particle 72kDa                                                      | 9.37e-05  | 0.47 |
| 555 | PHF17     | PHD finger protein 17                                                                  | 9.38e-05  | 2.13 |
| 556 | SCLT1     | sodium channel and clathrin linker 1                                                   | 9.4e-05   | 2.56 |
| 557 | DEPDC1B   | DEP domain containing 1B                                                               | 9.56e-05  | 2.13 |
| 558 | E2F8      | E2F transcription factor 8                                                             | 9.62e-05  | 4.00 |
| 559 | FOXM1     | forkhead box M1                                                                        | 9.62e-05  | 2.44 |
| 560 | SAT1      | spermidine/spermine N1-acetyltransferase 1                                             | 9.63e-05  | 0.39 |
| 561 | SDCCAG10  | serologically defined colon cancer antigen 10                                          | 9.76e-05  | 1.54 |
| 562 | BRWD1     | bromodomain and WD repeat domain containing 1                                          | 0.000101  | 0.38 |
| 563 | JMJD6     | jumonji domain containing 6                                                            | 0.0001024 | 0.60 |
| 564 | ZSCAN16   | zinc finger and SCAN domain containing 16                                              | 0.0001026 | 1.92 |
| 565 | LEAP2     | liver expressed antimicrobial peptide 2                                                | 0.0001068 | 0.53 |
| 566 | TM4SF1    | transmembrane 4 L six family member 1                                                  | 0.0001094 | 0.51 |
| 567 | ARRDC4    | arrestin domain containing 4                                                           | 0.0001105 | 0.35 |
| 568 | HIST1H2BF | histone cluster 1, H2bf                                                                | 0.0001108 | 0.44 |
| 569 | PDCD4     | programmed cell death 4 (neoplastic transformation inhibitor)                          | 0.0001115 | 0.54 |
| 570 | CTDSPL    | CTD (carboxy-terminal domain, RNA polymerase II, polypeptide A) small phosphatase-like | 0.000112  | 0.54 |
| 571 | TUBB2A    | tubulin, beta 2A                                                                       | 0.0001127 | 0.59 |
| 572 | MAL2      | mal, T-cell differentiation protein 2                                                  | 0.0001128 | 0.56 |
| 573 | CREBZF    | CREB/ATF bZIP transcription factor                                                     | 0.0001135 | 0.58 |
| 574 | C14orf106 | chromosome 14 open reading frame 106                                                   | 0.0001192 | 2.27 |
| 575 | NCAPD2    | non-SMC condensin I complex, subunit D2                                                | 0.0001201 | 1.72 |
| 576 | SMAD4     | SMAD family member 4                                                                   | 0.0001208 | 0.49 |
| 577 | MELK      | maternal embryonic leucine zipper kinase                                               | 0.0001227 | 2.63 |
| 578 | NT5E      | 5'-nucleotidase, ecto (CD73)                                                           | 0.000123  | 0.43 |
| 579 | DLK1      | delta-like 1 homolog ( <i>Drosophila</i> )                                             | 0.0001246 | 0.58 |
| 580 | AQP3      | aquaporin 3 (Gill blood group)                                                         | 0.0001257 | 0.43 |
| 581 | SLC17A2   | solute carrier family 17 (sodium phosphate), member 2                                  | 0.0001261 | 0.53 |
| 582 | ARL6IP6   | ADP-ribosylation-like factor 6 interacting protein 6                                   | 0.0001275 | 2.04 |
| 583 | TNNC1     | troponin C type 1 (slow)                                                               | 0.0001286 | 0.47 |
| 584 | LOC730101 | hypothetical LOC730101                                                                 | 0.0001289 | 1.96 |
| 585 | LSM5      | LSM5 homolog, U6 small nuclear RNA associated ( <i>S. cerevisiae</i> )                 | 0.0001299 | 1.79 |
| 586 | MCM8      | minichromosome maintenance complex component 8                                         | 0.0001309 | 2.50 |
| 587 | PBK       | PDZ binding kinase                                                                     | 0.000132  | 3.45 |
| 588 | ERAP1     | endoplasmic reticulum aminopeptidase 1                                                 | 0.0001334 | 0.44 |

|     |           |                                                                            |           |      |
|-----|-----------|----------------------------------------------------------------------------|-----------|------|
| 589 | BAMBI     | BMP and activin membrane-bound inhibitor homolog ( <i>Xenopus laevis</i> ) | 0.000134  | 1.72 |
| 590 | NANOS1    | nanos homolog 1 ( <i>Drosophila</i> )                                      | 0.0001358 | 0.50 |
| 591 | S100A11   | S100 calcium binding protein A11                                           | 0.0001407 | 1.96 |
| 592 | KLF6      | Kruppel-like factor 6                                                      | 0.0001416 | 0.46 |
| 593 | C19orf6   | chromosome 19 open reading frame 6                                         | 0.0001421 | 0.53 |
| 594 | NEDD9     | neural precursor cell expressed, developmentally down-regulated 9          | 0.0001429 | 0.48 |
| 595 | HIST1H2BH | histone cluster 1, H2bh                                                    | 0.0001431 | 0.39 |
| 596 | TCOF1     | Treacher Collins-Franceschetti syndrome 1                                  | 0.000146  | 2.86 |
| 597 | GINS2     | GINS complex subunit 2 (Psf2 homolog)                                      | 0.0001465 | 2.44 |
| 598 | KIAA0430  | KIAA0430                                                                   | 0.0001472 | 0.45 |
| 599 | PHTF2     | putative homeodomain transcription factor 2                                | 0.0001473 | 1.89 |
| 600 | LDLR      | low density lipoprotein receptor                                           | 0.0001488 | 0.46 |
| 601 | ITGA2     | integrin, alpha 2 (CD49B, alpha 2 subunit of VLA-2 receptor)               | 0.0001515 | 0.44 |
| 602 | C1orf104  | chromosome 1 open reading frame 104                                        | 0.0001516 | 0.48 |
| 603 | FLJ39632  | hypothetical LOC642477                                                     | 0.0001536 | 0.52 |
| 604 | DUSP6     | dual specificity phosphatase 6                                             | 0.0001537 | 0.53 |
| 605 | SALL1     | sal-like 1 ( <i>Drosophila</i> )                                           | 0.0001538 | 1.79 |
| 606 | RETSAT    | retinol saturase (all-trans-retinol 13,14-reductase)                       | 0.0001565 | 0.57 |
| 607 | IL11      | interleukin 11                                                             | 0.0001571 | 0.55 |
| 608 | MRPS23    | mitochondrial ribosomal protein S23                                        | 0.0001572 | 0.53 |
| 609 | SGMS2     | sphingomyelin synthase 2                                                   | 0.0001624 | 0.49 |
| 610 | CDS2      | CDP-diacylglycerol synthase (phosphatidate cytidylyltransferase) 2         | 0.000165  | 0.57 |
| 611 | BTBD3     | BTB (POZ) domain containing 3                                              | 0.0001673 | 0.52 |
| 612 | ARHGAP18  | Rho GTPase activating protein 18                                           | 0.0001683 | 1.89 |
| 613 | CHPT1     | choline phosphotransferase 1                                               | 0.0001697 | 0.53 |
| 614 | RAD51AP1  | RAD51 associated protein 1                                                 | 0.0001711 | 3.13 |
| 615 | CENPA     | centromere protein A                                                       | 0.0001734 | 3.45 |
| 616 | MDK       | midkine (neurite growth-promoting factor 2)                                | 0.0001754 | 0.53 |
| 617 | ESCO2     | establishment of cohesion 1 homolog 2 ( <i>S. cerevisiae</i> )             | 0.0001793 | 2.94 |
| 618 | EIF2AK3   | eukaryotic translation initiation factor 2-alpha kinase 3                  | 0.0001823 | 0.65 |
| 619 | TIMM17A   | translocase of inner mitochondrial membrane 17 homolog A (yeast)           | 0.0001842 | 0.39 |
| 620 | SYNJ2     | synaptojanin 2                                                             | 0.0001862 | 0.56 |
| 621 | DRAM2     | DNA-damage regulated autophagy modulator 2                                 | 0.0001865 | 0.47 |
| 622 | RACGAP1   | Rac GTPase activating protein 1                                            | 0.0001879 | 2.63 |
| 623 | HINT3     | histidine triad nucleotide binding protein 3                               | 0.0001896 | 0.36 |
| 624 | TFR2      | transferrin receptor 2                                                     | 0.0001957 | 0.41 |
| 625 | LIMA1     | LIM domain and actin binding 1                                             | 0.0001997 | 1.75 |
| 626 | PERP      | PERP, TP53 apoptosis effector                                              | 0.0002007 | 0.32 |
| 627 | MRPS31    | mitochondrial ribosomal protein S31                                        | 0.0002092 | 1.69 |
| 628 | TIMP3     | TIMP metalloproteinase inhibitor 3                                         | 0.0002102 | 0.44 |
| 629 | FBXL22    | F-box and leucine-rich repeat protein 22                                   | 0.0002132 | 1.85 |
| 630 | WIPI1     | WD repeat domain, phosphoinositide interacting 1                           | 0.0002148 | 0.39 |
| 631 | C10orf78  | chromosome 10 open reading frame 78                                        | 0.0002163 | 2.00 |



|            |             |                                                                            |                  |             |
|------------|-------------|----------------------------------------------------------------------------|------------------|-------------|
| 632        | GHITM       | growth hormone inducible transmembrane protein                             | 0.0002224        | 0.51        |
| 633        | RPA3        | replication protein A3, 14kDa                                              | 0.0002235        | 2.56        |
| 634        | UNG         | uracil-DNA glycosylase                                                     | 0.000227         | 2.08        |
| 635        | SLC6A8      | solute carrier family 6 (neurotransmitter transporter, creatine), member 8 | 0.0002282        | 0.50        |
| 636        | HSPD1       | heat shock 60kDa protein 1 (chaperonin)                                    | 0.0002292        | 0.47        |
| 637        | E2F7        | E2F transcription factor 7                                                 | 0.000232         | 2.08        |
| 638        | C10orf10    | chromosome 10 open reading frame 10                                        | 0.0002327        | 0.23        |
| 639        | PIF1        | PIF1 5'-to-3' DNA helicase homolog (S. cerevisiae)                         | 0.0002346        | 2.70        |
| 640        | MND1        | meiotic nuclear divisions 1 homolog (S. cerevisiae)                        | 0.0002349        | 3.45        |
| 641        | BIRC5       | baculoviral IAP repeat-containing 5                                        | 0.0002361        | 2.44        |
| 642        | SYNE2       | spectrin repeat containing, nuclear envelope 2                             | 0.0002361        | 2.22        |
| 643        | MAD2L1      | MAD2 mitotic arrest deficient-like 1 (yeast)                               | 0.0002376        | 2.63        |
| 644        | GPBP1L1     | GC-rich promoter binding protein 1-like 1                                  | 0.0002412        | 0.48        |
| 645        | GLB1        | galactosidase, beta 1                                                      | 0.00026          | 0.47        |
| 646        | FAM83D      | family with sequence similarity 83, member D                               | 0.0002653        | 2.33        |
| 647        | LOC729887   | hypothetical protein LOC729887                                             | 0.0002678        | 1.82        |
| 648        | C5orf34     | chromosome 5 open reading frame 34                                         | 0.0002753        | 1.49        |
| 649        | DERL1       | Der1-like domain family, member 1                                          | 0.000276         | 0.50        |
| 650        | NUDT1       | nudix (nucleoside diphosphate linked moiety X)-type motif 1                | 0.0002772        | 2.13        |
| 651        | TTC14       | tetratricopeptide repeat domain 14                                         | 0.0002774        | 0.44        |
| 652        | PPIL5       | peptidylprolyl isomerase (cyclophilin)-like 5                              | 0.0002774        | 1.96        |
| 653        | PBLD        | phenazine biosynthesis-like protein domain containing                      | 0.0002782        | 2.70        |
| 654        | YME1L1      | YME1-like 1 (S. cerevisiae)                                                | 0.0002791        | 0.53        |
| 655        | IFI6        | interferon, alpha-inducible protein 6                                      | 0.0002821        | 0.51        |
| 656        | EHHADH      | enoyl-Coenzyme A, hydratase/3-hydroxyacyl Coenzyme A dehydrogenase         | 0.0002847        | 2.17        |
| 657        | RASD1       | RAS, dexamethasone-induced 1                                               | 0.0002902        | 0.41        |
| <b>658</b> | <b>MAFF</b> | <b>v-maf musculoaponeurotic fibrosarcoma oncogene homolog F (avian)</b>    | <b>0.0002924</b> | <b>0.19</b> |
| 659        | C1D         | C1D nuclear receptor co-repressor                                          | 0.0002957        | 0.44        |
| 660        | ABCA5       | ATP-binding cassette, sub-family A (ABC1), member 5                        | 0.0002974        | 0.47        |
| 661        | DNAJB9      | DnaJ (Hsp40) homolog, subfamily B, member 9                                | 0.0003047        | 0.53        |
| 662        | RNASEH2A    | ribonuclease H2, subunit A                                                 | 0.0003068        | 1.96        |
| 663        | SNRPN       | small nuclear ribonucleoprotein polypeptide N                              | 0.0003106        | 0.59        |
| 664        | DOK6        | docking protein 6                                                          | 0.000315         | 0.49        |
| 665        | RSRC1       | arginine/serine-rich coiled-coil 1                                         | 0.000315         | 1.61        |
| 666        | C8orf4      | chromosome 8 open reading frame 4                                          | 0.0003161        | 0.21        |
| 667        | PCYT1B      | phosphate cytidyltransferase 1, choline, beta                              | 0.0003214        | 3.03        |
| 668        | ZSWIM7      | zinc finger, SWIM-type containing 7                                        | 0.0003234        | 0.49        |
| 669        | C5orf26     | chromosome 5 open reading frame 26                                         | 0.0003242        | 0.56        |
| 670        | BRP44       | brain protein 44                                                           | 0.0003264        | 1.92        |
| 671        | MYO10       | myosin X                                                                   | 0.0003268        | 2.38        |
| 672        | C16orf75    | chromosome 16 open reading frame 75                                        | 0.000334         | 2.44        |
| 673        | KIF11       | kinesin family member 11                                                   | 0.0003364        | 3.23        |
| 674        | SELS        | selenoprotein S                                                            | 0.0003415        | 0.50        |

|     |          |                                                                            |           |      |
|-----|----------|----------------------------------------------------------------------------|-----------|------|
| 675 | CCNA2    | cyclin A2                                                                  | 0.0003548 | 2.22 |
| 676 | DNAJC14  | DnaJ (Hsp40) homolog, subfamily C, member 14                               | 0.0003561 | 0.57 |
| 677 | DUT      | deoxyuridine triphosphatase                                                | 0.0003779 | 1.92 |
| 678 | ANKRD32  | ankyrin repeat domain 32                                                   | 0.0003975 | 1.89 |
| 679 | TGOLN2   | trans-golgi network protein 2                                              | 0.0003991 | 0.51 |
| 680 | DNA2     | DNA replication helicase 2 homolog (yeast)                                 | 0.0004034 | 2.27 |
| 681 | C6orf211 | chromosome 6 open reading frame 211                                        | 0.000408  | 2.04 |
| 682 | DHFR     | dihydrofolate reductase                                                    | 0.0004244 | 2.86 |
| 683 | MTIF2    | mitochondrial translational initiation factor 2                            | 0.0004349 | 1.82 |
| 684 | ERO1LB   | ERO1-like beta ( <i>S. cerevisiae</i> )                                    | 0.0004458 | 0.49 |
| 685 | C6orf130 | chromosome 6 open reading frame 130                                        | 0.0004499 | 1.52 |
| 686 | WWC2     | WW and C2 domain containing 2                                              | 0.0004528 | 1.49 |
| 687 | DSG2     | desmoglein 2                                                               | 0.0004532 | 0.50 |
| 688 | C8orf40  | chromosome 8 open reading frame 40                                         | 0.0004793 | 0.56 |
| 689 | APP      | amyloid beta (A4) precursor protein                                        | 0.0004807 | 0.47 |
| 690 | FANCD2   | Fanconi anemia, complementation group D2                                   | 0.0004826 | 2.44 |
| 691 | HNF4G    | hepatocyte nuclear factor 4, gamma                                         | 0.0004976 | 0.52 |
| 692 | LRP10    | low density lipoprotein receptor-related protein 10                        | 0.0005019 | 0.56 |
| 693 | ORC6L    | origin recognition complex, subunit 6 like (yeast)                         | 0.0005148 | 1.92 |
| 694 | TMEFF1   | transmembrane protein with EGF-like and two follistatin-like domains 1     | 0.0005178 | 0.35 |
| 695 | SKP1     | S-phase kinase-associated protein 1                                        | 0.0005248 | 0.38 |
| 696 | TNFSF14  | tumor necrosis factor (ligand) superfamily, member 14                      | 0.0005274 | 0.43 |
| 697 | RSC1A1   | regulatory solute carrier protein, family 1, member 1                      | 0.0005356 | 2.08 |
| 698 | RMI1     | RMI1, RecQ mediated genome instability 1, homolog ( <i>S. cerevisiae</i> ) | 0.0005435 | 2.33 |
| 699 | RRM1     | ribonucleotide reductase M1                                                | 0.000546  | 2.17 |
| 700 | P4HB     | prolyl 4-hydroxylase, beta polypeptide                                     | 0.0005492 | 0.27 |
| 701 | DNAJB1   | DnaJ (Hsp40) homolog, subfamily B, member 1                                | 0.000551  | 0.52 |
| 702 | CD24     | CD24 molecule                                                              | 0.0005564 | 0.48 |
| 703 | C1orf112 | chromosome 1 open reading frame 112                                        | 0.0005609 | 1.64 |
| 704 | LYZ      | lysozyme (renal amyloidosis)                                               | 0.0005661 | 0.28 |
| 705 | PDIA2    | protein disulfide isomerase family A, member 2                             | 0.0005767 | 0.45 |
| 706 | C3orf23  | chromosome 3 open reading frame 23                                         | 0.0005815 | 0.53 |
| 707 | CBX4     | chromobox homolog 4 (Pc class homolog, <i>Drosophila</i> )                 | 0.0005863 | 0.56 |
| 708 | UHRF1BP1 | UHRF1 binding protein 1                                                    | 0.0005872 | 1.75 |
| 709 | RAD54B   | RAD54 homolog B ( <i>S. cerevisiae</i> )                                   | 0.0005949 | 1.96 |
| 710 | GAS2L3   | growth arrest-specific 2 like 3                                            | 0.000627  | 2.56 |
| 711 | PTP4A1   | protein tyrosine phosphatase type IVA, member 1                            | 0.0006275 | 0.51 |
| 712 | USP31    | ubiquitin specific peptidase 31                                            | 0.000628  | 0.60 |
| 713 | SLC16A3  | solute carrier family 16, member 3 (monocarboxylic acid transporter 4)     | 0.0006287 | 0.50 |
| 714 | IPP      | intracisternal A particle-promoted polypeptide                             | 0.000634  | 1.85 |
| 715 | HPN      | hepsin                                                                     | 0.0006356 | 0.51 |
| 716 | ANXA3    | annexin A3                                                                 | 0.0006373 | 0.58 |
| 717 | PGK1     | phosphoglycerate kinase 1                                                  | 0.0006434 | 0.53 |

|     |            |                                                                            |           |      |
|-----|------------|----------------------------------------------------------------------------|-----------|------|
| 718 | EFR3A      | EFR3 homolog A ( <i>S. cerevisiae</i> )                                    | 0.0006466 | 0.54 |
| 719 | WDYHV1     | WDYHV motif containing 1                                                   | 0.0006628 | 0.42 |
| 720 | CHST9      | carbohydrate (N-acetylgalactosamine 4-O) sulfotransferase 9                | 0.0006716 | 4.00 |
| 721 | HSPA8      | heat shock 70kDa protein 8                                                 | 0.0006842 | 0.52 |
| 722 | MASTL      | microtubule associated serine/threonine kinase-like                        | 0.0007025 | 2.17 |
| 723 | FAM19A5    | family with sequence similarity 19 (chemokine (C-C motif)-like), member A5 | 0.0007071 | 0.52 |
| 724 | PSAP       | prosaposin                                                                 | 0.0007121 | 0.47 |
| 725 | ALB        | albumin                                                                    | 0.0007186 | 0.28 |
| 726 | INSIG2     | insulin induced gene 2                                                     | 0.0007311 | 0.56 |
| 727 | RSL1D1     | ribosomal L1 domain containing 1                                           | 0.0007596 | 0.41 |
| 728 | PSMD7      | proteasome (prosome, macropain) 26S subunit, non-ATPase, 7                 | 0.0007666 | 0.59 |
| 729 | NCRNA00204 | non-protein coding RNA 204                                                 | 0.0007757 | 0.57 |
| 730 | ARF1       | ADP-ribosylation factor 1                                                  | 0.0007858 | 0.43 |
| 731 | LOC729680  | hypothetical protein LOC729680                                             | 0.0008121 | 0.48 |
| 732 | C8G        | complement component 8, gamma polypeptide                                  | 0.000827  | 0.47 |
| 733 | PPP3R1     | protein phosphatase 3 (formerly 2B), regulatory subunit B, alpha isoform   | 0.0008358 | 0.49 |
| 734 | TRIB1      | tribbles homolog 1 ( <i>Drosophila</i> )                                   | 0.0008563 | 0.46 |
| 735 | ACSL3      | acyl-CoA synthetase long-chain family member 3                             | 0.0008615 | 0.50 |
| 736 | RHOBTB1    | Rho-related BTB domain containing 1                                        | 0.0008666 | 2.63 |
| 737 | INHBE      | inhibin, beta E                                                            | 0.000874  | 0.46 |
| 738 | PLEKHA6    | pleckstrin homology domain containing, family A member 6                   | 0.0008786 | 1.82 |
| 739 | NEK7       | NIMA (never in mitosis gene a)-related kinase 7                            | 0.0009124 | 0.54 |
| 740 | SKA1       | spindle and kinetochore associated complex subunit 1                       | 0.0009765 | 2.63 |
| 741 | JUN        | jun oncogene                                                               | 0.0009798 | 0.42 |
| 742 | SLC2A3     | solute carrier family 2 (facilitated glucose transporter), member 3        | 0.0009851 | 1.39 |

## Supplementary Table S2

**Table S2: Functional classification of genes differentially expressed between the *Spor* and *SalGld* groups using KEGG and Biocarta pathways.** Gene expression changes were expressed as fold change between *Spor* to *SalGld*, and represent the ratio of the geometric mean intensities of *Spor* to those of *SalGld*. Datasets representing the three time points within each experimental group have been grouped together and were regarded as experimental replicates.

| Gene symbol | Description                                                               | Parametric p-value | Fold-change |
|-------------|---------------------------------------------------------------------------|--------------------|-------------|
|             | <b><u>Antigen processing and presentation (Kegg Pathway hsa04612)</u></b> |                    |             |
| HSPA1A      | heat shock 70kDa protein 1A                                               | < 1e-07            | 0.33        |
| NA          | NA                                                                        | < 1e-07            | 0.16        |
| CTSB        | cathepsin B                                                               | 9e-07              | 0.31        |
| HLA-C       | major histocompatibility complex, class I, C                              | 1.5e-06            | 0.45        |
| HSPA5       | heat shock 70kDa protein 5 (glucose-regulated protein, 78kDa)             | 1.6e-06            | 0.48        |
| CTSB        | cathepsin B                                                               | 3e-06              | 0.47        |
| HLA-B       | major histocompatibility complex, class I, B                              | 3.9e-06            | 0.40        |
| RFX5        | regulatory factor X, 5 (influences HLA class II expression)               | 8.5e-06            | 1.82        |
| PDIA3       | protein disulfide isomerase family A, member 3                            | 1.43e-05           | 0.45        |
| IFI30       | interferon, gamma-inducible protein 30                                    | 2.87e-05           | 1.72        |
| RFXAP       | regulatory factor X-associated protein                                    | 3.41e-05           | 1.92        |
| HLA-F       | major histocompatibility complex, class I, F                              | 4.32e-05           | 0.53        |
| HSPA8       | heat shock 70kDa protein 8                                                | 6.844e-04          | 0.52        |
|             | <b><u>Ubiquitin mediated proteolysis (Kegg Pathway hsa04120)</u></b>      |                    |             |
| CDC20       | cell division cycle 20 homolog (S. cerevisiae)                            | < 1e-07            | 4.00        |
| UBE2C       | ubiquitin-conjugating enzyme E2C                                          | < 1e-07            | 2.63        |
| SKP2        | S-phase kinase-associated protein 2 (p45)                                 | 1.5e-06            | 2.13        |
| SMURF2      | SMAD specific E3 ubiquitin protein ligase 2                               | 6.17e-05           | 0.38        |
| SKP1        | S-phase kinase-associated protein 1                                       | 5.249e-04          | 0.38        |
|             | <b><u>Glycerolipid metabolism (Kegg Pathway hsa00561)</u></b>             |                    |             |
| ADH4        | alcohol dehydrogenase 4 (class II), pi polypeptide                        | 1e-07              | 2.70        |
| ADH6        | alcohol dehydrogenase 6 (class V)                                         | 2e-07              | 2.17        |
| GPAM        | glycerol-3-phosphate acyltransferase, mitochondrial                       | 9e-06              | 0.49        |
| DGAT1       | diacylglycerol O-acyltransferase homolog 1 (mouse)                        | 9.5e-06            | 1.96        |
| ALDH7A1     | aldehyde dehydrogenase 7 family, member A1                                | 1.31e-05           | 1.92        |
| GLB1        | galactosidase, beta 1                                                     | 2.6e-04            | 0.47        |
|             | <b><u>Cell cycle (Kegg Pathway hsa04110)</u></b>                          |                    |             |
| CDC20       | cell division cycle 20 homolog (S. cerevisiae)                            | < 1e-07            | 4.00        |
| PTTG1       | pituitary tumor-transforming 1                                            | < 1e-07            | 3.33        |
| CCNB1       | cyclin B1                                                                 | 7e-07              | 3.45        |
| CDC25C      | cell division cycle 25 homolog C (S. pombe)                               | 7e-07              | 2.50        |
| BUB1        | budding uninhibited by benzimidazoles 1 homolog (yeast)                   | 1e-06              | 3.85        |
| CDC2        | cell division cycle 2, G1 to S and G2 to M                                | 1.2e-06            | 4.17        |

|        |                                                                                          |          |      |
|--------|------------------------------------------------------------------------------------------|----------|------|
| TGFB1  | transforming growth factor, beta 1                                                       | 1.3e-06  | 0.38 |
| SKP2   | S-phase kinase-associated protein 2 (p45)                                                | 1.5e-06  | 2.13 |
| MCM5   | minichromosome maintenance complex component 5                                           | 2.1e-06  | 3.85 |
| CCNE2  | cyclin E2                                                                                | 2.1e-06  | 2.13 |
| ORC3L  | origin recognition complex, subunit 3-like (yeast)                                       | 2.8e-06  | 1.96 |
| RB1    | retinoblastoma 1                                                                         | 5.5e-06  | 1.96 |
| DBF4   | DBF4 homolog (S. cerevisiae)                                                             | 8.4e-06  | 2.22 |
| CDKN2C | cyclin-dependent kinase inhibitor 2C (p18, inhibits CDK4)                                | 1.43e-05 | 3.45 |
| CDC45L | CDC45 cell division cycle 45-like (S. cerevisiae)                                        | 2.55e-05 | 2.04 |
| CCNB2  | cyclin B2                                                                                | 3.62e-05 | 2.22 |
| MCM3   | minichromosome maintenance complex component 3                                           | 4.1e-05  | 2.00 |
| ESPL1  | extra spindle pole bodies homolog 1 (S. cerevisiae)                                      | 4.77e-05 | 2.38 |
| ORC5L  | origin recognition complex, subunit 5-like (yeast)                                       | 5.81e-05 | 1.61 |
| MCM7   | minichromosome maintenance complex component 7                                           | 7.77e-05 | 1.79 |
| YWHAB  | tyrosine 3-monooxygenase/tryptophan 5-monooxygenase activation protein, beta polypeptide | 8.26e-05 | 0.43 |
| SMAD4  | SMAD family member 4                                                                     | 1.20e-04 | 0.49 |
| MAD2L1 | MAD2 mitotic arrest deficient-like 1 (yeast)                                             | 2.37e-04 | 2.63 |
| CCNA2  | cyclin A2                                                                                | 3.54e-04 | 2.22 |
| ORC6L  | origin recognition complex, subunit 6 like (yeast)                                       | 5.14e-04 | 1.92 |
| SKP1   | S-phase kinase-associated protein 1                                                      | 5.24e-04 | 0.38 |
|        | <b><u>ECM-receptor interaction (Kegg Pathway hsa04512)</u></b>                           |          |      |
| CD36   | CD36 molecule (thrombospondin receptor)                                                  | 1e-07    | 2.70 |
| VTN    | vitronectin                                                                              | 1.6e-06  | 0.39 |
| SDC4   | syndecan 4                                                                               | 2.3e-06  | 0.47 |
| FN1    | fibronectin 1                                                                            | 3e-06    | 0.56 |
| THBS1  | thrombospondin 1                                                                         | 2.3e-05  | 0.23 |
| HMMR   | hyaluronan-mediated motility receptor (RHAMM)                                            | 4.96e-05 | 3.45 |
| ITGA2  | integrin, alpha 2 (CD49B, alpha 2 subunit of VLA-2 receptor)                             | 1.51e-04 | 0.44 |
|        | <b><u>Cell Communication (Kegg Pathway hsa01430)</u></b>                                 |          |      |
| LMNB1  | lamin B1                                                                                 | 9e-07    | 2.50 |
| KRT19  | keratin 19                                                                               | 9e-07    | 4.76 |
| VTN    | vitronectin                                                                              | 1.6e-06  | 0.39 |
| FN1    | fibronectin 1                                                                            | 3e-06    | 0.56 |
| THBS1  | thrombospondin 1                                                                         | 2.3e-05  | 0.23 |
| DSG2   | desmoglein 2                                                                             | 4.53e-04 | 0.50 |
|        | <b><u>MAPK signaling pathway (Kegg Pathway hsa04010)</u></b>                             |          |      |
| HSPA1A | heat shock 70kDa protein 1A                                                              | < 1e-07  | 0.33 |
| NA     | NA                                                                                       | < 1e-07  | 0.16 |
| TGFB1  | transforming growth factor, beta 1                                                       | 1.3e-06  | 0.38 |
| HSPA5  | heat shock 70kDa protein 5 (glucose-regulated protein, 78kDa)                            | 1.6e-06  | 0.48 |
| DUSP1  | dual specificity phosphatase 1                                                           | 8.4e-06  | 0.27 |
| FLNA   | filamin A, alpha                                                                         | 1.19e-05 | 0.50 |
| ATF4   | activating transcription factor 4 (tax-responsive enhancer element B67)                  | 1.6e-05  | 1.64 |

|         |                                                                                                                        |                        |      |
|---------|------------------------------------------------------------------------------------------------------------------------|------------------------|------|
| STMN1   | stathmin 1                                                                                                             | 1.8e-05                | 2.33 |
| IL1R1   | interleukin 1 receptor, type I                                                                                         | 4.3e-05                | 1.92 |
| DUSP6   | dual specificity phosphatase 6                                                                                         | 1.53e-04               | 0.53 |
| HSPA8   | heat shock 70kDa protein 8                                                                                             | 6.84e-04               | 0.52 |
| PPP3R1  | protein phosphatase 3 (formerly 2B), regulatory subunit B, alpha isoform                                               | 8.36e-04               | 0.49 |
| JUN     | jun oncogene                                                                                                           | 9.8e-04                | 0.42 |
|         | <b><u>Fatty acid metabolism (Kegg Pathway hsa00071)</u></b>                                                            |                        |      |
| ADH4    | alcohol dehydrogenase 4 (class II), pi polypeptide                                                                     | 1e-07                  | 2.70 |
| ADH6    | alcohol dehydrogenase 6 (class V)                                                                                      | 2e-07                  | 2.17 |
| ALDH7A1 | aldehyde dehydrogenase 7 family, member A1                                                                             | 1.31e-05               | 1.92 |
| EHHADH  | enoyl-Coenzyme A, hydratase/3-hydroxyacyl Coenzyme A dehydrogenase                                                     | 2.84e-04               | 2.17 |
| ACSL3   | acyl-CoA synthetase long-chain family member 3                                                                         | 8.61e-04               | 0.50 |
|         | <b><u>Type I diabetes mellitus (Kegg Pathway hsa04940)</u></b>                                                         |                        |      |
| HLA-C   | major histocompatibility complex, class I, C                                                                           | 1.5e-06                | 0.45 |
| CPE     | carboxypeptidase E                                                                                                     | 1.7e-06                | 0.45 |
| HLA-B   | major histocompatibility complex, class I, B                                                                           | 3.9e-06                | 0.40 |
| HLA-F   | major histocompatibility complex, class I, F                                                                           | 4.32e-05               | 0.53 |
| HSPD1   | heat shock 60kDa protein 1 (chaperonin)                                                                                | 2.29e-04               | 0.47 |
|         | <b><u>Metabolism of xenobiotics by cytochrome P450 (Kegg Pathway hsa00980)</u></b>                                     |                        |      |
| GSTA2   | Glutathione S-transferase A2                                                                                           | <1 x 10 <sup>-7</sup>  | 5.88 |
| ADH4    | alcohol dehydrogenase 4 (class II), pi polypeptide                                                                     | 1.0 x 10 <sup>-7</sup> | 2.70 |
| ADH6    | alcohol dehydrogenase 6 (class V)                                                                                      | 2.0 x 10 <sup>-7</sup> | 2.17 |
| UGT1A6  | UDP glucuronosyltransferase 1 family, polypeptide A6                                                                   | 1.2 x 10 <sup>-6</sup> | 2.22 |
| CYP1A1  | cytochrome P450, family 1, subfamily A, polypeptide 1                                                                  | 2.2 x 10 <sup>-5</sup> | 0.15 |
| AKR1C1  | aldo-keto reductase family 1, member C1 (dihydrodiol dehydrogenase 1; 20-alpha (3-alpha)-hydroxysteroid dehydrogenase) | 1.5 x 10 <sup>-3</sup> | 0.42 |
| CYP3A5  | cytochrome P450, family 3, subfamily A, polypeptide 5                                                                  | 7.9 x 10 <sup>-2</sup> | 0.66 |
|         | <b><u>Cell adhesion molecules (CAMs) (Kegg Pathway hsa04514)</u></b>                                                   |                        |      |
| HLA-C   | major histocompatibility complex, class I, C                                                                           | 1.5e-06                | 0.45 |
| SDC4    | syndecan 4                                                                                                             | 2.3e-06                | 0.47 |
| HLA-B   | major histocompatibility complex, class I, B                                                                           | 3.9e-06                | 0.40 |
| L1CAM   | L1 cell adhesion molecule                                                                                              | 6.8e-06                | 0.52 |
| ALCAM   | activated leukocyte cell adhesion molecule                                                                             | 2.59e-05               | 0.52 |
| HLA-F   | major histocompatibility complex, class I, F                                                                           | 4.32e-05               | 0.53 |
| ITGB2   | integrin, beta 2 (complement component 3 receptor 3 and 4 subunit)                                                     | 4.84e-05               | 0.50 |
| PTPRF   | protein tyrosine phosphatase, receptor type, F                                                                         | 5.02e-05               | 0.59 |
|         | <b><u>Glycolysis/Gluconeogenesis (Kegg Pathway hsa00010)</u></b>                                                       |                        |      |
| ADH4    | alcohol dehydrogenase 4 (class II), pi polypeptide                                                                     | 1e-07                  | 2.70 |
| ADH6    | alcohol dehydrogenase 6 (class V)                                                                                      | 2e-07                  | 2.17 |
| G6PC    | glucose-6-phosphatase, catalytic subunit                                                                               | 1.3e-06                | 0.25 |
| ALDH7A1 | aldehyde dehydrogenase 7 family, member A1                                                                             | 1.31e-05               | 1.92 |
| PDHA1   | pyruvate dehydrogenase (lipoamide) alpha 1                                                                             | 1.46e-05               | 1.82 |
| ALDOA   | aldolase A, fructose-bisphosphate                                                                                      | 4.88e-05               | 0.53 |

|           |                                                                                               |          |      |
|-----------|-----------------------------------------------------------------------------------------------|----------|------|
| PGK1      | phosphoglycerate kinase 1                                                                     | 6.43e-04 | 0.53 |
| PGK1      | phosphoglycerate kinase 1                                                                     | 1.31e-04 | 0.39 |
|           | <b><u>Complement and coagulation cascades (Kegg Pathway hsa04610)</u></b>                     |          |      |
| C5        | complement component 5                                                                        | 1.7e-06  | 0.22 |
| SERPINE1  | serpin peptidase inhibitor, clade E (nexin, plasminogen activator inhibitor type 1), member 1 | 2.1e-06  | 0.18 |
| F5        | coagulation factor V (proaccelerin, labile factor)                                            | 2.3e-06  | 0.37 |
| C2        | complement component 2                                                                        | 3.5e-06  | 0.40 |
| SERPIND1  | serpin peptidase inhibitor, clade D (heparin cofactor), member 1                              | 7.6e-06  | 0.39 |
| F10       | coagulation factor X                                                                          | 7.7e-06  | 0.46 |
| F2        | coagulation factor II (thrombin)                                                              | 1.36e-05 | 0.52 |
| SERPINA5  | serpin peptidase inhibitor, clade A (alpha-1 antiproteinase, antitrypsin), member 5           | 2.54e-05 | 0.35 |
| PLG       | plasminogen                                                                                   | 2.9e-05  | 0.52 |
| CPB2      | carboxypeptidase B2 (plasma)                                                                  | 6.77e-05 | 1.82 |
| C8G       | complement component 8, gamma polypeptide                                                     | 8.27e-04 | 0.47 |
|           | <b><u>Regulation of actin cytoskeleton (Kegg Pathway hsa04810)</u></b>                        |          |      |
| IQGAP3    | IQ motif containing GTPase activating protein 3                                               | 7e-07    | 3.03 |
| FN1       | fibronectin 1                                                                                 | 3e-06    | 0.56 |
| DIAPH3    | diaphanous homolog 3 (Drosophila)                                                             | 9.4e-06  | 2.63 |
| F2        | coagulation factor II (thrombin)                                                              | 1.36e-05 | 0.52 |
| BUB1B     | budding uninhibited by benzimidazoles 1 homolog beta (yeast)                                  | 1.9e-05  | 2.63 |
| ITGB2     | integrin, beta 2 (complement component 3 receptor 3 and 4 subunit)                            | 4.84e-05 | 0.50 |
| ITGA2     | integrin, alpha 2 (CD49B, alpha 2 subunit of VLA-2 receptor)                                  | 1.51e-04 | 0.44 |
|           | <b><u>Natural killer cell mediated cytotoxicity (Kegg Pathway hsa04650)</u></b>               |          |      |
| TNFRSF10D | tumor necrosis factor receptor superfamily, member 10d, decoy with truncated death domain     | 8e-07    | 0.32 |
| HLA-C     | major histocompatibility complex, class I, C                                                  | 1.5e-06  | 0.45 |
| HLA-B     | major histocompatibility complex, class I, B                                                  | 3.9e-06  | 0.40 |
| ITGB2     | integrin, beta 2 (complement component 3 receptor 3 and 4 subunit)                            | 4.84e-05 | 0.50 |
| PPP3R1    | protein phosphatase 3 (formerly 2B), regulatory subunit B, alpha isoform                      | 8.36e-04 | 0.49 |
|           | <b><u>Pyrimidine metabolism (Kegg Pathway hsa00240)</u></b>                                   |          |      |
| TK1       | thymidine kinase 1, soluble                                                                   | < 1e-07  | 3.03 |
| POLA1     | polymerase (DNA directed), alpha 1, catalytic subunit                                         | 2e-07    | 2.63 |
| WSB2      | WD repeat and SOCS box-containing 2                                                           | 3.2e-06  | 0.56 |
| POLD1     | polymerase (DNA directed), delta 1, catalytic subunit 125kDa                                  | 2.06e-05 | 1.85 |
| POLR1D    | polymerase (RNA) I polypeptide D, 16kDa                                                       | 2.93e-05 | 0.49 |
| PRIM2     | primase, DNA, polypeptide 2 (58kDa)                                                           | 5.2e-05  | 2.78 |
| NT5E      | 5'-nucleotidase, ecto (CD73)                                                                  | 1.23e-04 | 0.43 |
| DUT       | deoxyuridine triphosphatase                                                                   | 3.78e-04 | 1.92 |
| RRM1      | ribonucleotide reductase M1                                                                   | 5.46e-04 | 2.17 |
|           | <b><u>Hematopoietic cell lineage (Kegg Pathway hsa04640)</u></b>                              |          |      |
| CD36      | CD36 molecule (thrombospondin receptor)                                                       | 1e-07    | 2.70 |
| KITLG     | KIT ligand                                                                                    | 3.3e-06  | 2.63 |
| IL1R1     | interleukin 1 receptor, type I                                                                | 4.3e-05  | 1.92 |
| CD9       | CD9 molecule                                                                                  | 8.08e-05 | 0.44 |

|           |                                                                                           |          |      |
|-----------|-------------------------------------------------------------------------------------------|----------|------|
| ITGA2     | integrin, alpha 2 (CD49B, alpha 2 subunit of VLA-2 receptor)                              | 1.51e-04 | 0.44 |
| IL11      | interleukin 11                                                                            | 1.57e-04 | 0.55 |
|           | <b>Cytokine-cytokine receptor interaction (Kegg Pathway hsa04060)</b>                     |          |      |
| TNFRSF10D | tumor necrosis factor receptor superfamily, member 10d, decoy with truncated death domain | 8e-07    | 0.32 |
| CCL20     | chemokine (C-C motif) ligand 20                                                           | 1.2e-06  | 0.13 |
| TGFB1     | transforming growth factor, beta 1                                                        | 1.3e-06  | 0.38 |
| KITLG     | KIT ligand                                                                                | 3.3e-06  | 2.63 |
| CXCL2     | chemokine (C-X-C motif) ligand 2                                                          | 7.1e-06  | 0.15 |
| IL8       | interleukin 8                                                                             | 1.62e-05 | 0.36 |
| CXCL16    | chemokine (C-X-C motif) ligand 16                                                         | 1.96e-05 | 0.43 |
| IL1R1     | interleukin 1 receptor, type I                                                            | 4.3e-05  | 1.92 |
| IL18      | interleukin 18 (interferon-gamma-inducing factor)                                         | 5.82e-05 | 2.27 |
| IL11      | interleukin 11                                                                            | 1.57e-04 | 0.55 |
| TNFSF14   | tumor necrosis factor (ligand) superfamily, member 14                                     | 5.27e-04 | 0.43 |
| INHBE     | inhibin, beta E                                                                           | 8.74e-04 | 0.46 |
|           | <b>Purine metabolism (Kegg Pathway hsa00230)</b>                                          |          |      |
| POLA1     | polymerase (DNA directed), alpha 1, catalytic subunit                                     | 2e-07    | 2.63 |
| WSB2      | WD repeat and SOCS box-containing 2                                                       | 3.2e-06  | 0.56 |
| POLD1     | polymerase (DNA directed), delta 1, catalytic subunit 125kDa                              | 2.06e-05 | 1.85 |
| POLR1D    | polymerase (RNA) I polypeptide D, 16kDa                                                   | 2.93e-05 | 0.49 |
| PRIM2     | primase, DNA, polypeptide 2 (58kDa)                                                       | 5.2e-05  | 2.78 |
| NT5E      | 5'-nucleotidase, ecto (CD73)                                                              | 1.23e-04 | 0.43 |
| RRM1      | ribonucleotide reductase M1                                                               | 5.46e-04 | 2.17 |
|           | <b>Focal adhesion (Kegg Pathway hsa04510)</b>                                             |          |      |
| VTN       | vitronectin                                                                               | 1.6e-06  | 0.39 |
| FN1       | fibronectin 1                                                                             | 3e-06    | 0.56 |
| FLNA      | filamin A, alpha                                                                          | 1.19e-05 | 0.50 |
| BUB1B     | budding uninhibited by benzimidazoles 1 homolog beta (yeast)                              | 1.9e-05  | 2.63 |
| THBS1     | thrombospondin 1                                                                          | 2.3e-05  | 0.23 |
| ITGA2     | integrin, alpha 2 (CD49B, alpha 2 subunit of VLA-2 receptor)                              | 1.51e-04 | 0.44 |
| JUN       | jun oncogene                                                                              | 9.8e-04  | 0.42 |
|           | <b>Gap junction (Kegg Pathway hsa04540)</b>                                               |          |      |
| CDC2      | cell division cycle 2, G1 to S and G2 to M                                                | 1.2e-06  | 4.17 |
| TUBA1A    | tubulin, alpha 1a                                                                         | 2.7e-05  | 0.34 |
| PLCB1     | phospholipase C, beta 1 (phosphoinositide-specific)                                       | 3.55e-05 | 0.52 |
| TUBB2B    | tubulin, beta 2B                                                                          | 7.67e-05 | 0.18 |
| TUBB2A    | tubulin, beta 2A                                                                          | 1.12e-04 | 0.59 |
|           | <b>TGF-beta signaling pathway (Kegg Pathway hsa04350)</b>                                 |          |      |
| TGFB1     | transforming growth factor, beta 1                                                        | 1.3e-06  | 0.38 |
| FST       | follistatin                                                                               | 2e-06    | 0.31 |
| PPP2CB    | protein phosphatase 2 (formerly 2A), catalytic subunit, beta isoform                      | 6.8e-06  | 0.56 |
| THBS1     | thrombospondin 1                                                                          | 2.3e-05  | 0.23 |
| SMURF2    | SMAD specific E3 ubiquitin protein ligase 2                                               | 6.17e-05 | 0.38 |



|        |                                                                                                                     |           |      |
|--------|---------------------------------------------------------------------------------------------------------------------|-----------|------|
| SMAD4  | SMAD family member 4                                                                                                | 1.20e-04  | 0.49 |
| SKP1   | S-phase kinase-associated protein 1                                                                                 | 5.24e-04  | 0.38 |
| INHBE  | inhibin, beta E                                                                                                     | 8.74e-04  | 0.46 |
|        | <b><u>Glycerophospholipid metabolism (Kegg Pathway hsa00564)</u></b>                                                |           |      |
| LYPLA1 | lysophospholipase I                                                                                                 | 2.3e-06   | 0.57 |
| GPAM   | glycerol-3-phosphate acyltransferase, mitochondrial                                                                 | 9e-06     | 0.49 |
| CDS2   | CDP-diacylglycerol synthase (phosphatidate cytidyltransferase) 2                                                    | 1.65e-04  | 0.57 |
| CHPT1  | choline phosphotransferase 1                                                                                        | 1.69e-04  | 0.53 |
| ESCO2  | establishment of cohesion 1 homolog 2 ( <i>S. cerevisiae</i> )                                                      | 1.79e-04  | 2.94 |
| PCYT1B | phosphate cytidyltransferase 1, choline, beta                                                                       | 3.21e-04  | 3.03 |
|        | <b><u>Wnt signaling pathway (Kegg Pathway hsa04310)</u></b>                                                         |           |      |
| DKK1   | dickkopf homolog 1 ( <i>Xenopus laevis</i> )                                                                        | 2e-07     | 5.00 |
| PPP2CB | protein phosphatase 2 (formerly 2A), catalytic subunit, beta isoform                                                | 6.8e-06   | 0.56 |
| PLCB1  | phospholipase C, beta 1 (phosphoinositide-specific)                                                                 | 3.55e-05  | 0.52 |
| SMAD4  | SMAD family member 4                                                                                                | 1.20e-04  | 0.49 |
| SKP1   | S-phase kinase-associated protein 1                                                                                 | 5.24e-04  | 0.38 |
| PPP3R1 | protein phosphatase 3 (formerly 2B), regulatory subunit B, alpha isoform                                            | 8.36e-04  | 0.49 |
| JUN    | jun oncogene                                                                                                        | 9.8e-04   | 0.42 |
|        | <b><u>Cell Cycle: G1/S Check Point (Biocarta h_g1Pathway)</u></b>                                                   |           |      |
| CDC2   | cell division cycle 2, G1 to S and G2 to M                                                                          | 1.2e-06   | 4.17 |
| TGFB1  | transforming growth factor, beta 1                                                                                  | 1.3e-06   | 0.38 |
| SKP2   | S-phase kinase-associated protein 2 (p45)                                                                           | 1.5e-06   | 2.13 |
| RB1    | retinoblastoma 1                                                                                                    | 5.5e-06   | 1.96 |
| SMAD4  | SMAD family member 4                                                                                                | 1.20e-04  | 0.49 |
| DHFR   | dihydrofolate reductase                                                                                             | 4.24e-04  | 2.86 |
|        | <b><u>CDK Regulation of DNA Replication h_mcmPathway</u></b>                                                        |           |      |
| MCM5   | minichromosome maintenance complex component 5                                                                      | 2.1e-06   | 3.85 |
| ORC3L  | origin recognition complex, subunit 3-like (yeast)                                                                  | 2.8e-06   | 1.96 |
| KITLG  | KIT ligand                                                                                                          | 3.3e-06   | 2.63 |
| CDT1   | chromatin licensing and DNA replication factor 1                                                                    | 5.4e-06   | 2.94 |
| MCM3   | minichromosome maintenance complex component 3                                                                      | 4.1e-05   | 2.00 |
| ORC5L  | origin recognition complex, subunit 5-like (yeast)                                                                  | 5.81e-05  | 1.61 |
| MCM7   | minichromosome maintenance complex component 7                                                                      | 7.77e-05  | 1.79 |
| ORC6L  | origin recognition complex, subunit 6 like (yeast)                                                                  | 5.14 e-04 | 1.92 |
|        | <b><u>Mechanism of Gene Regulation by Peroxisome Proliferators via PPAR<math>\alpha</math> (h_pparaPathway)</u></b> |           |      |
| HSPA1A | heat shock 70kDa protein 1A                                                                                         | < 1e-07   | 0.33 |
| RB1    | retinoblastoma 1                                                                                                    | 5.5e-06   | 1.96 |
| DUSP1  | dual specificity phosphatase 1                                                                                      | 8.4e-06   | 0.27 |
| NCOR1  | nuclear receptor co-repressor 1                                                                                     | 1.13e-05  | 1.61 |
| PDGFA  | platelet-derived growth factor alpha polypeptide                                                                    | 2.02e-05  | 0.35 |
| EHHADH | enoyl-Coenzyme A, hydratase/3-hydroxyacyl Coenzyme A dehydrogenase                                                  | 2.84e-04  | 2.17 |
| DUT    | deoxyuridine triphosphatase                                                                                         | 3.78e-04  | 1.92 |
| JUN    | jun oncogene                                                                                                        | 9.8e-04   | 0.42 |

### Supplementary Figure S1

**Figure S1: Relative expression of genes from the *Spor* vs. *Irrad* DEGs to demonstrate the differential gene expression among the four study groups. The expression (mean  $\pm$  SE) of the 29 *Spor/Irrad* DEGs listed in Table 2 was plotted.**

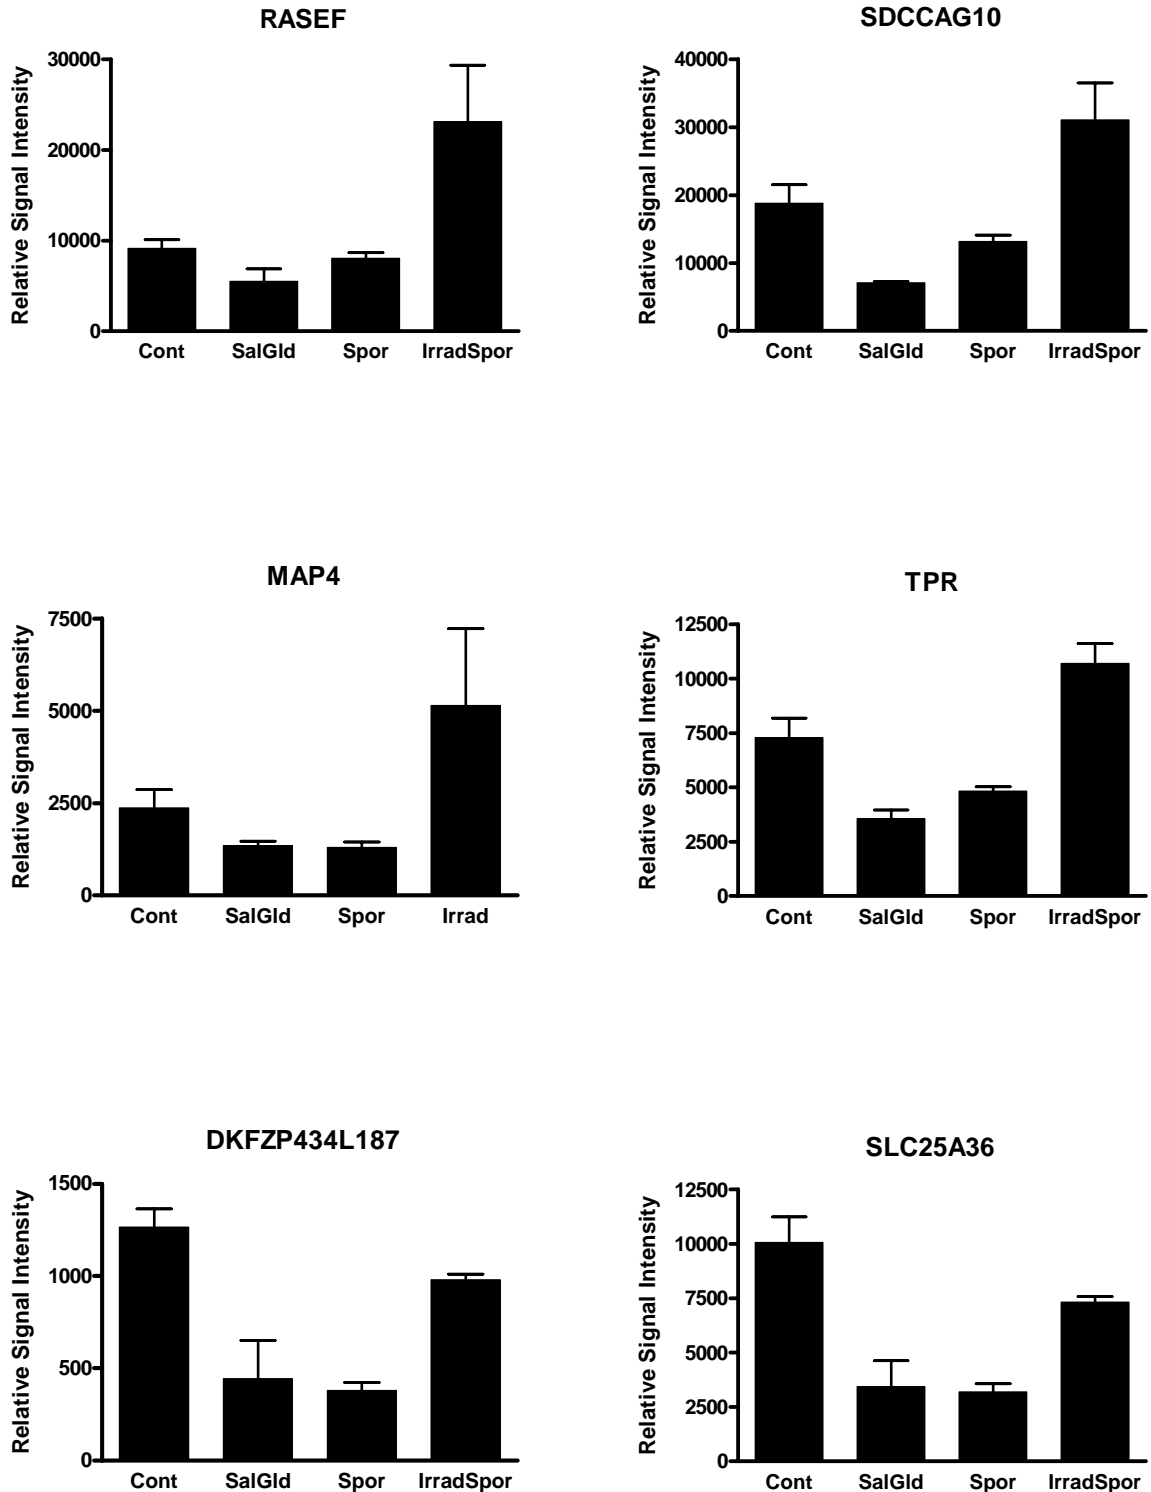

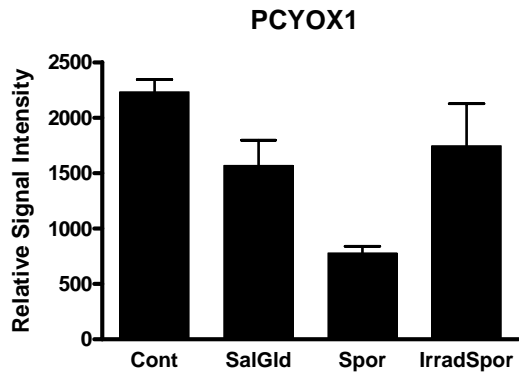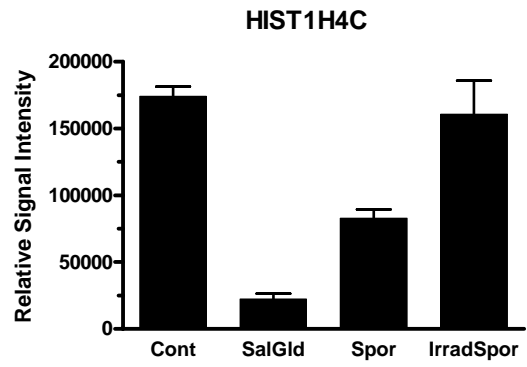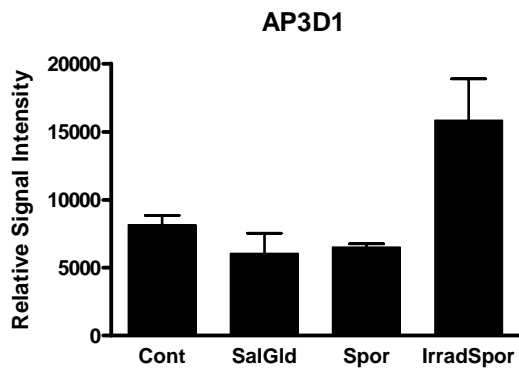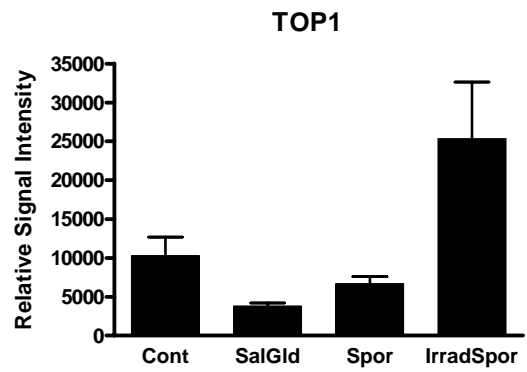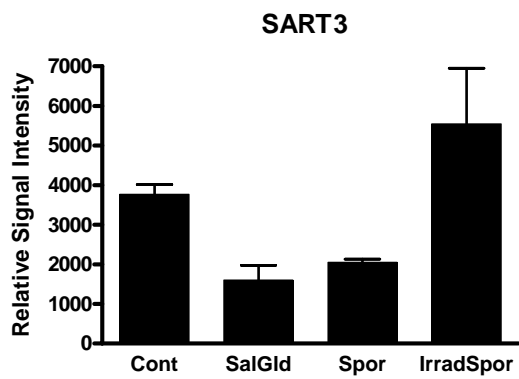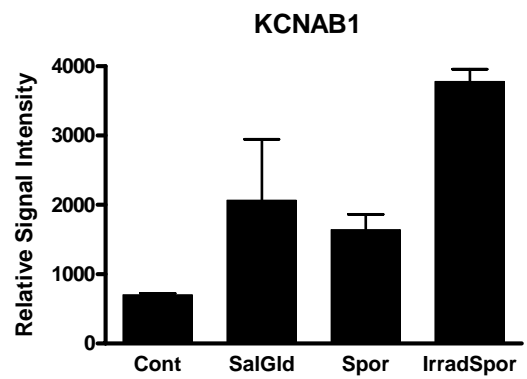

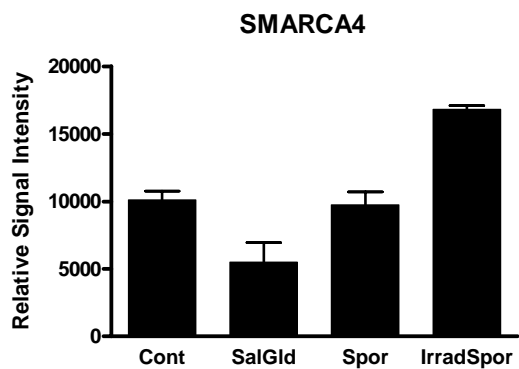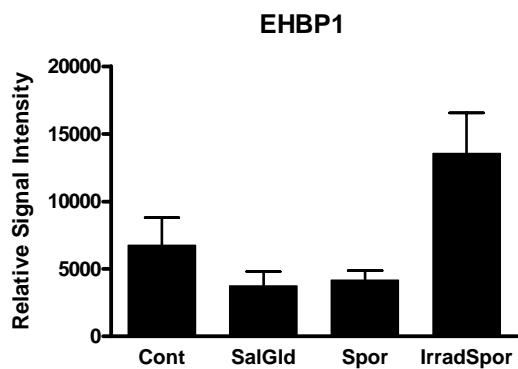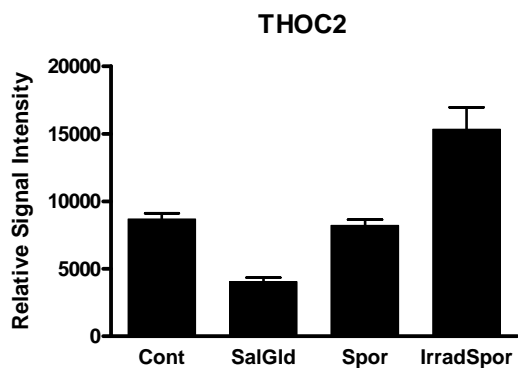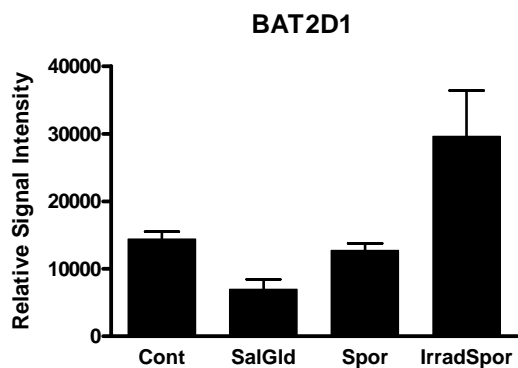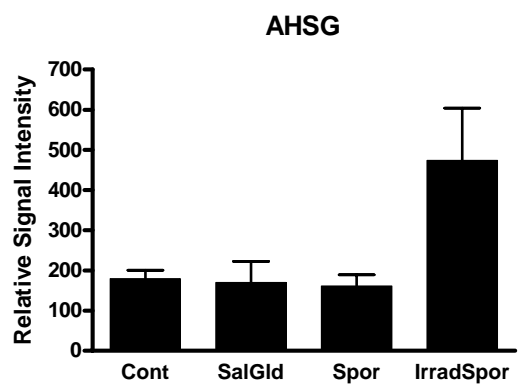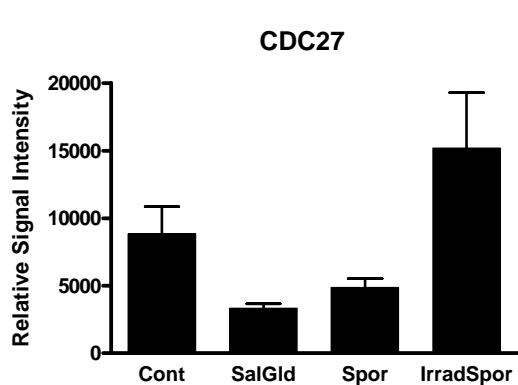

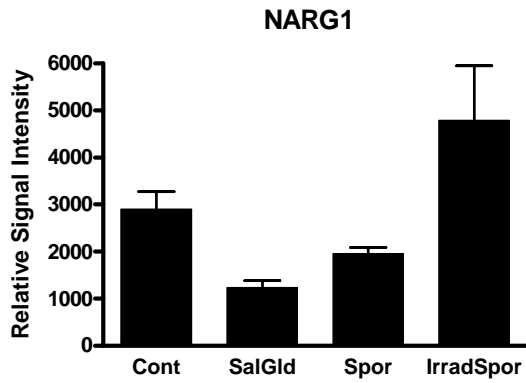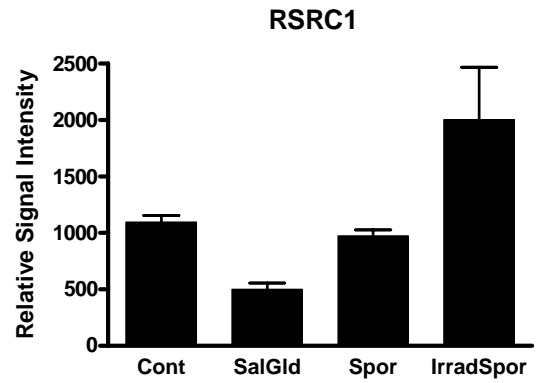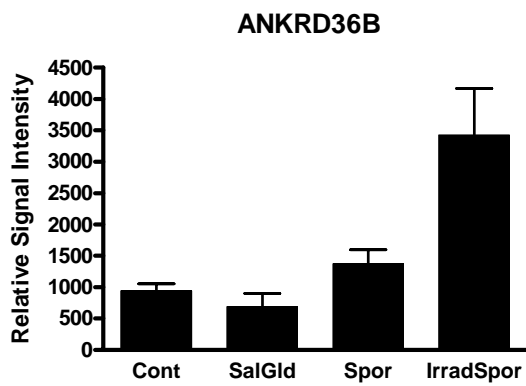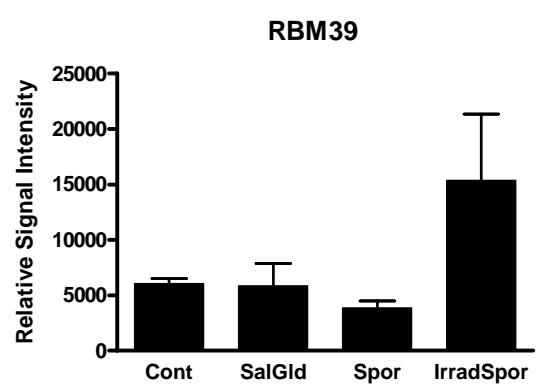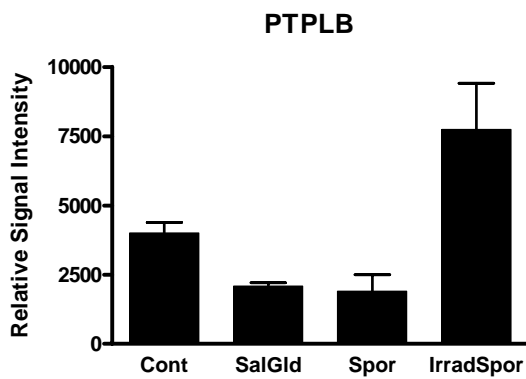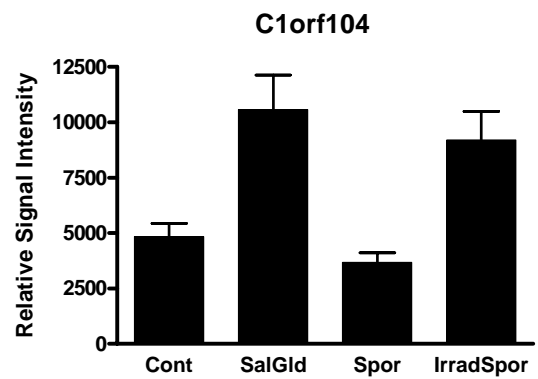

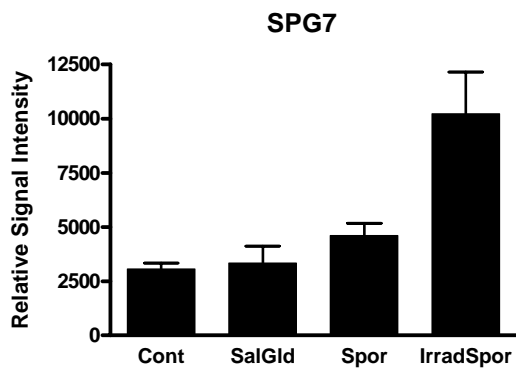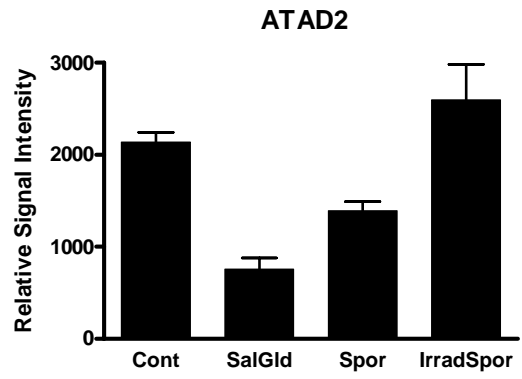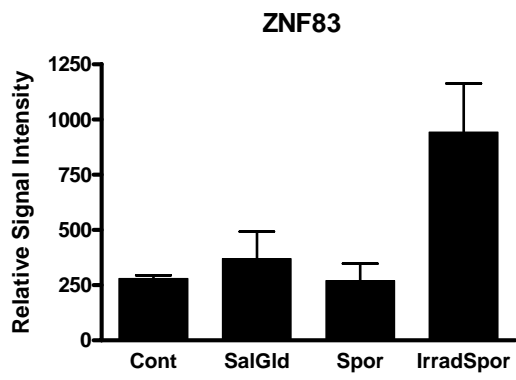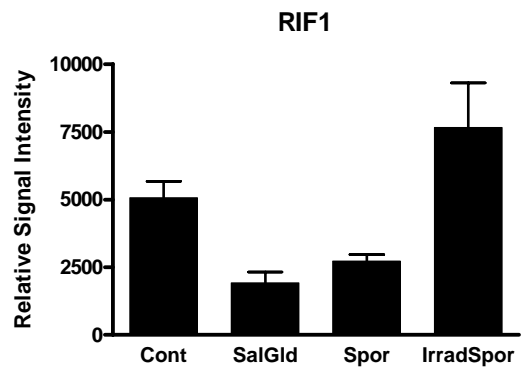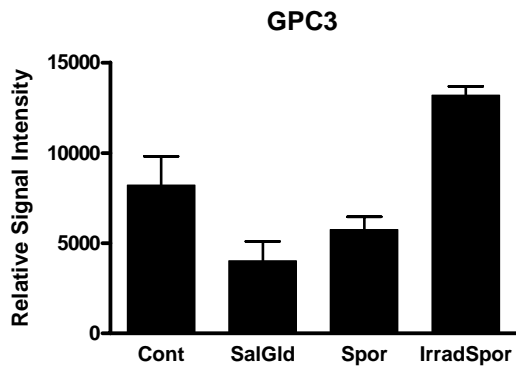

**Supplementary Figure S2**

**Figure S2: Expression of glutathione S-transferase A2 gene, *GSTA2*, among the four study groups.**

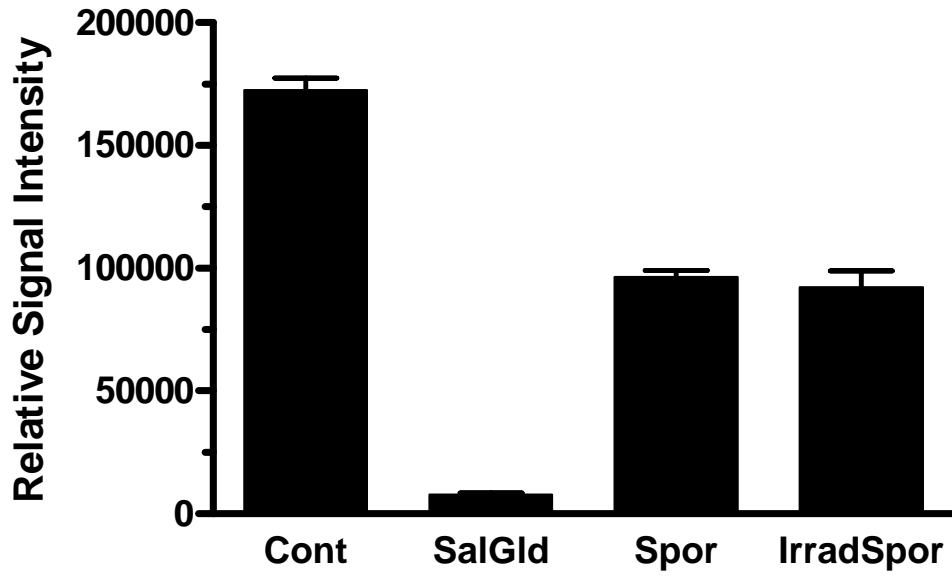

**Supplementary Figure S3**

**Figure S3: Expression of some Ras subfamily genes among the four study groups.**

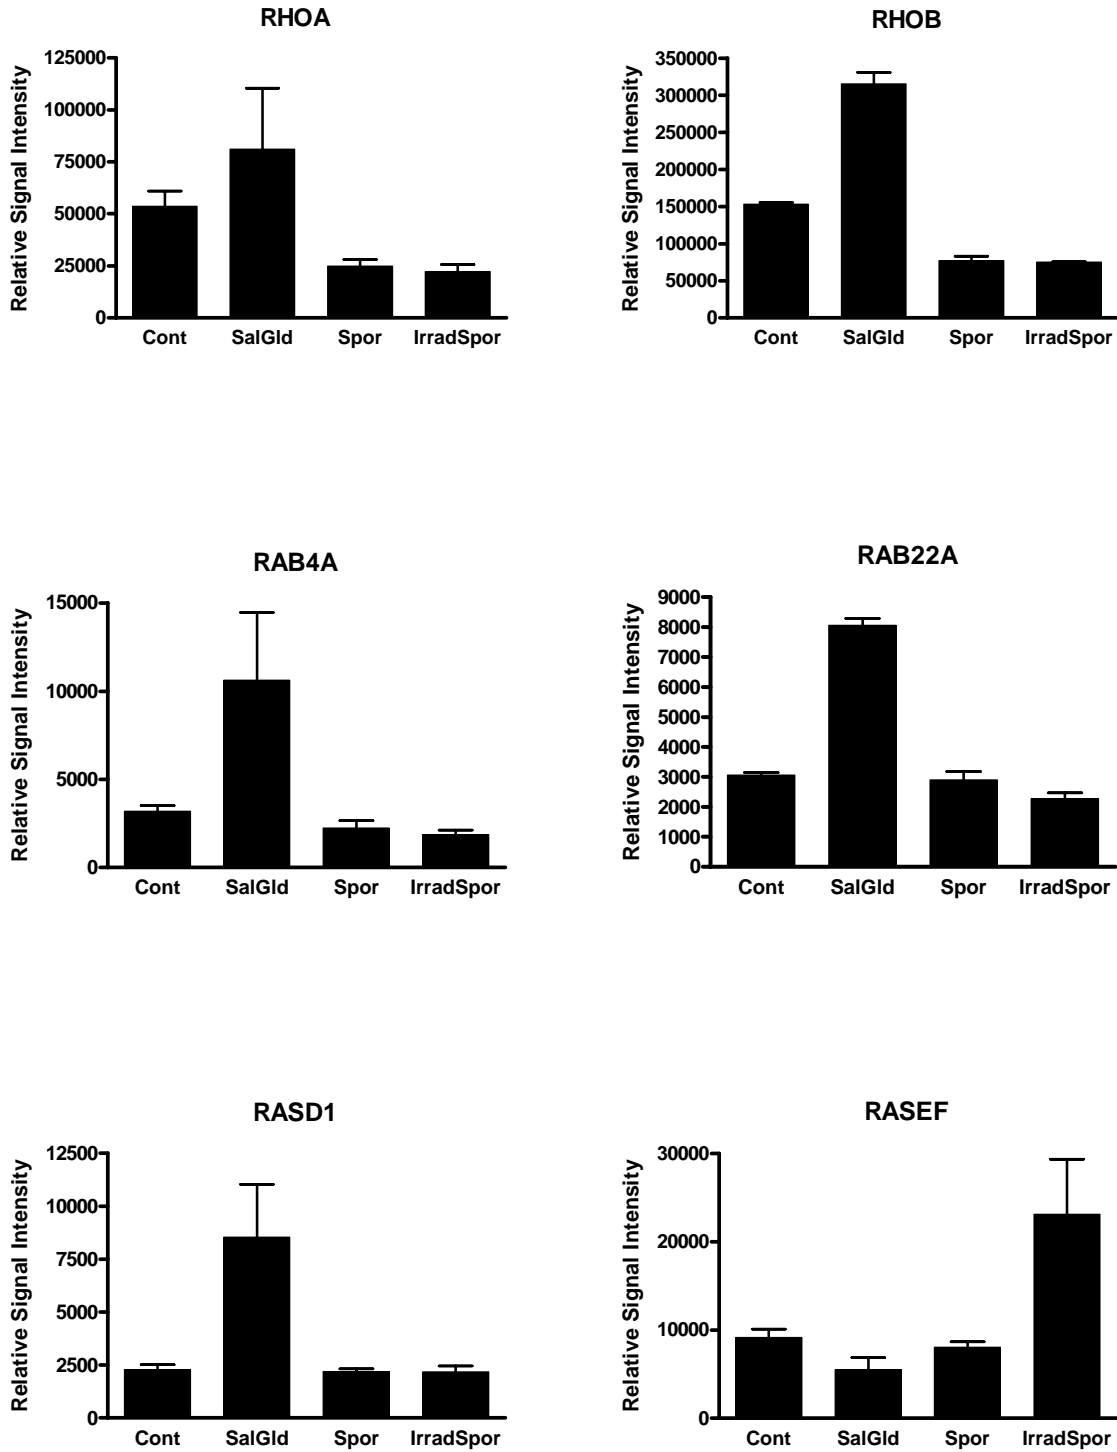

Supplement: supp_M111.240879_jbc.M111.240879-1.pdf [file supp_M111.240879_jbc.M111.240879-1.pdf]
